# Supplementary material for: A reference genome for common bean and genome-wide analysis of dual domestications
Source: PubMed Central journal article supplement — Nat Genet. 2014 Jun 8;46(7):707–13. doi: 10.1038/ng.3008 (PMC7048698; doi:10.1038/ng.3008), 2014-06-08
Supplement: 41588_2014_BFng3008_MOESM57_ESM.pdf [file 41588_2014_BFng3008_MOESM57_ESM.pdf]

## A reference genome for common bean and genome-wide analysis of dual domestications.

Jeremy Schmutz, Phillip McClean, Sujan Mamidi, G. Albert Wu, Steven B. Cannon, Jane Grimwood, Jerry Jenkins, Shengqiang Shu, Qijian Song, Carolina Chavarro, Mirayda Torres-Torres, Valerie Geffroy, Samira Mafi Moghaddam, Dongying Gao, Brian Abernathy, Kerrie Barry, Matthew Blair, Mark A. Brick, Mansi Chovatia, Paul Gepts, David M Goodstein, Michael Gonzales, Uffe Hellsten, David L. Hyten, Gaofeng Jia, James D. Kelly, Dave Kudrna, Rian Lee, Manon M.S. Richard, Phillip N. Miklas, Juan M. Osorno, Josiane Rodrigues, Vincent Thareau, Carlos A. Urrea, Mei Wang, Yeisoo Yu, Ming Zhang, Rod A. Wing, Perry B. Cregan, Daniel S. Rokhsar, Scott A. Jackson

### Content:

**A. Supplementary Figures 1 to 25**

**B. Supplementary Tables 1 to 22**

**C. Supplementary Note**

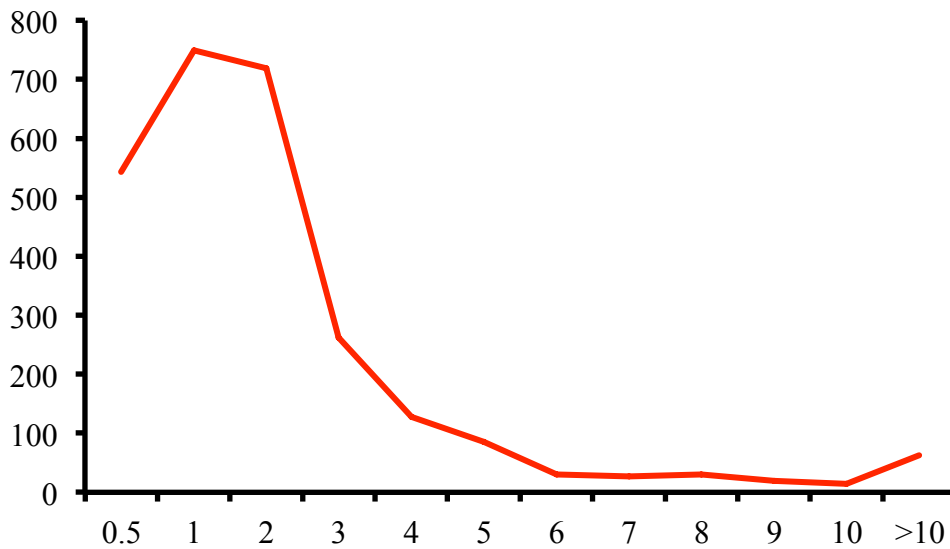

**Supplementary Figure 1.** The insertion times of full length LTR retrotransposons in common bean.

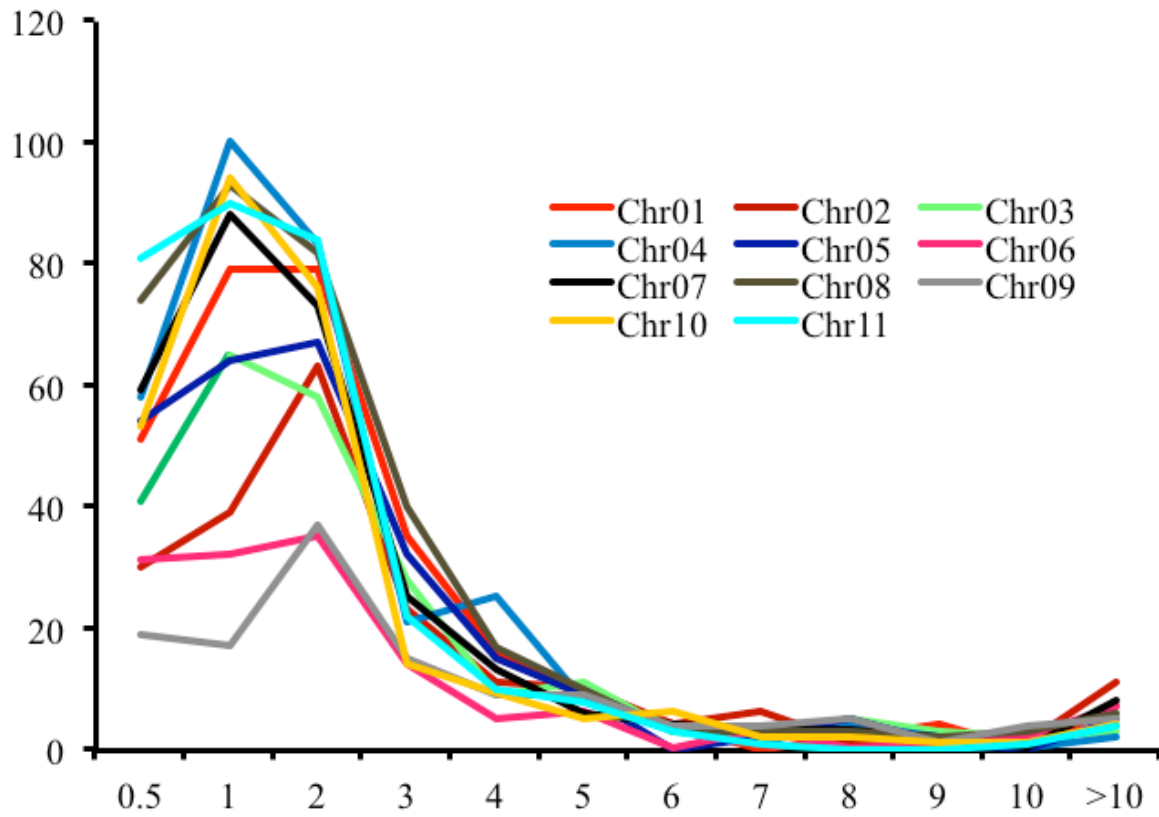

**Supplementary Figure 2.** The integration times of full length LTR retrotransposons on the 11 chromosomes of common bean.

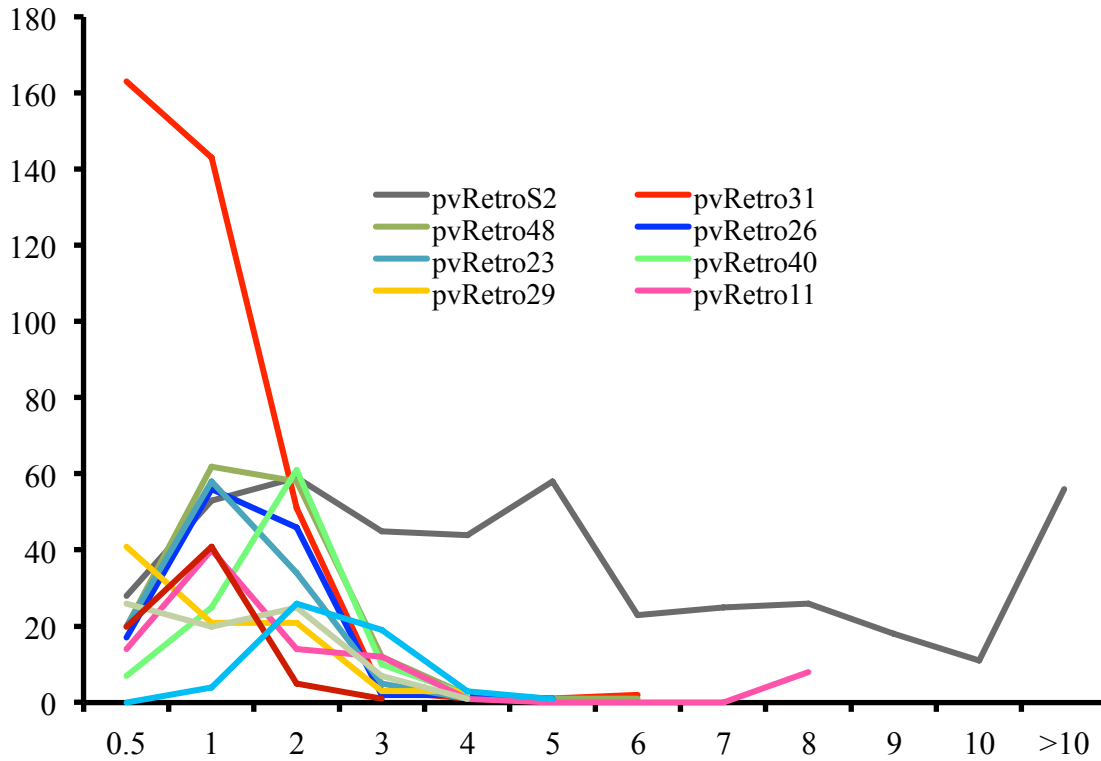

**Supplementary Figure 3.** The insertion times of 11 LTR retrotransposon families each of which contains more than 50 complete elements.

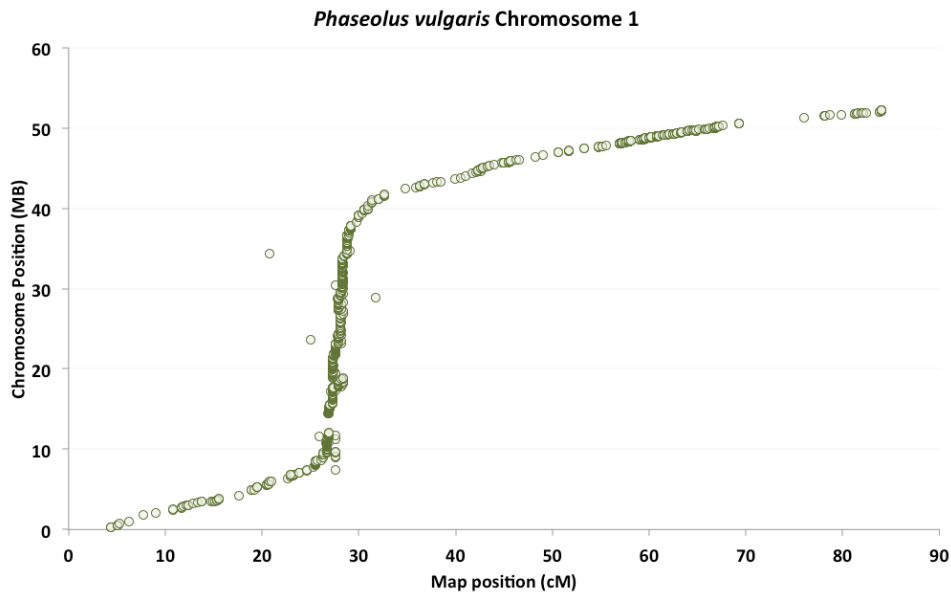

**Supplementary Figure 4.** Marker placements for the genetic map on the *Phaseolus vulgaris* chromosome 1.

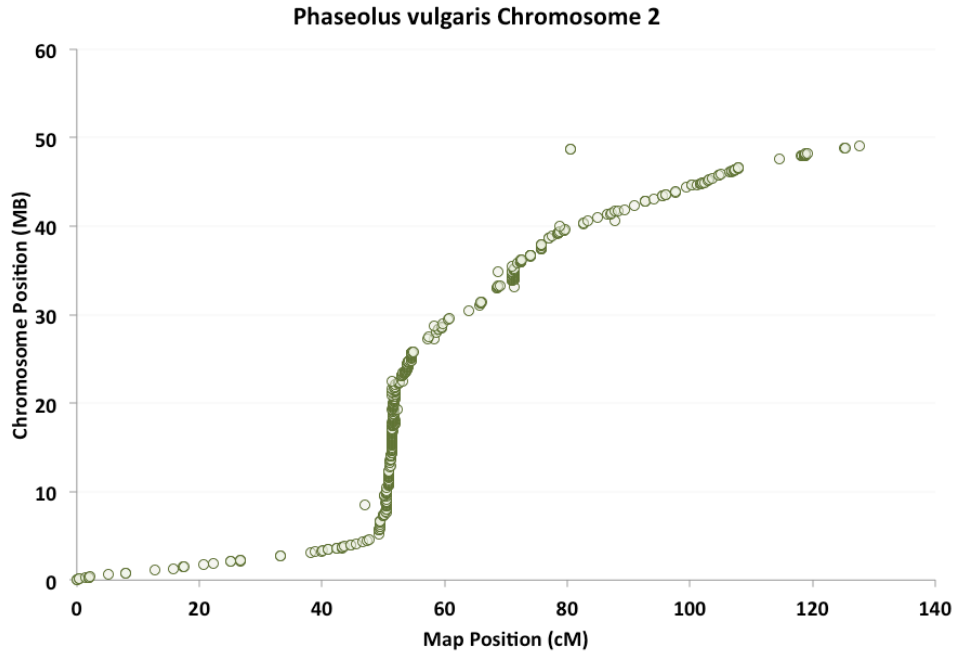

**Supplementary Figure 5:** Marker placements for the genetic map on the *Phaseolus vulgaris* chromosome 2.

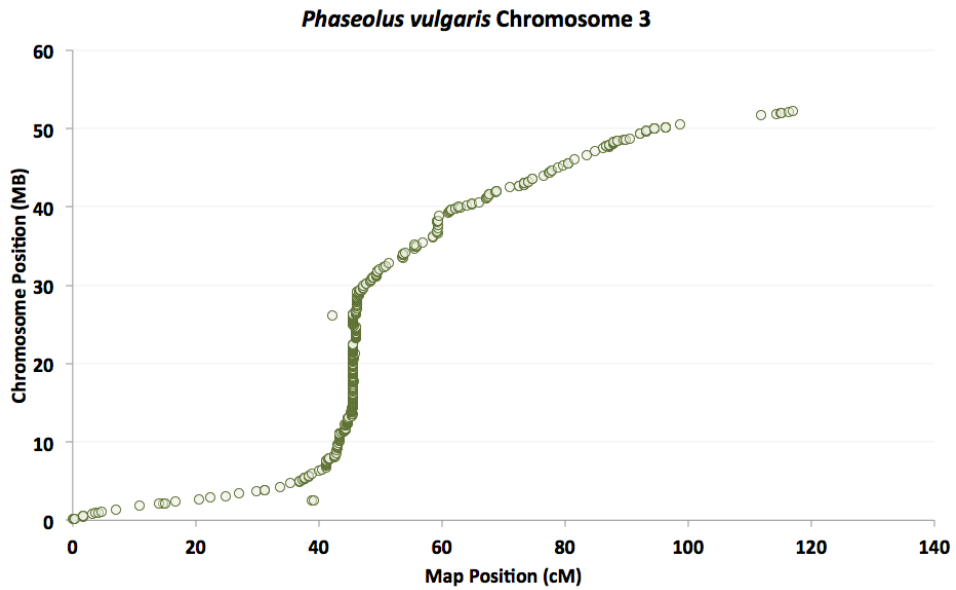

**Supplementary Figure 6:** Marker placements for the genetic map on the *Phaseolus vulgaris* chromosome 3.

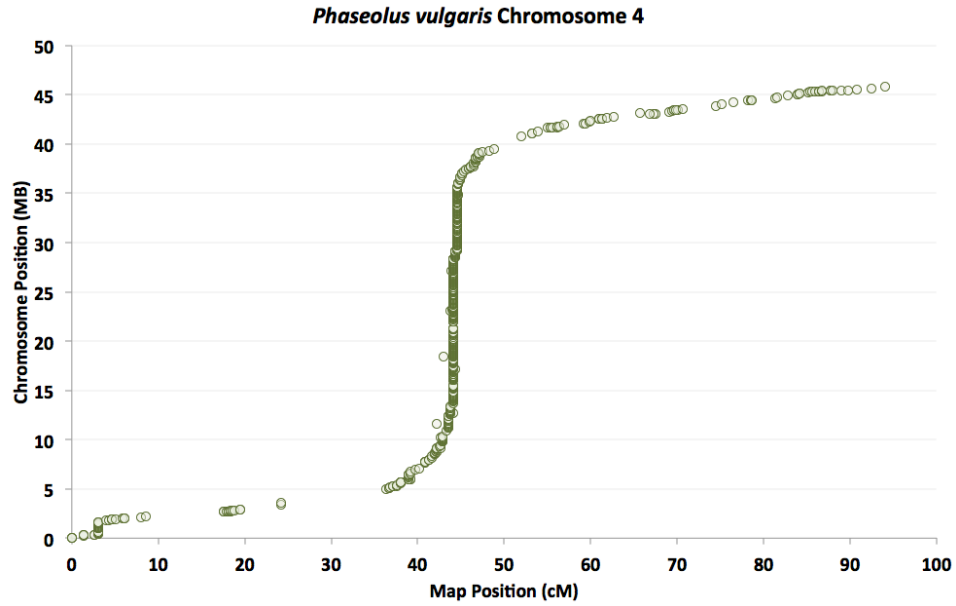

**Supplementary Figure 7:** Marker placements for the genetic map on the *Phaseolus vulgaris* chromosome 4.

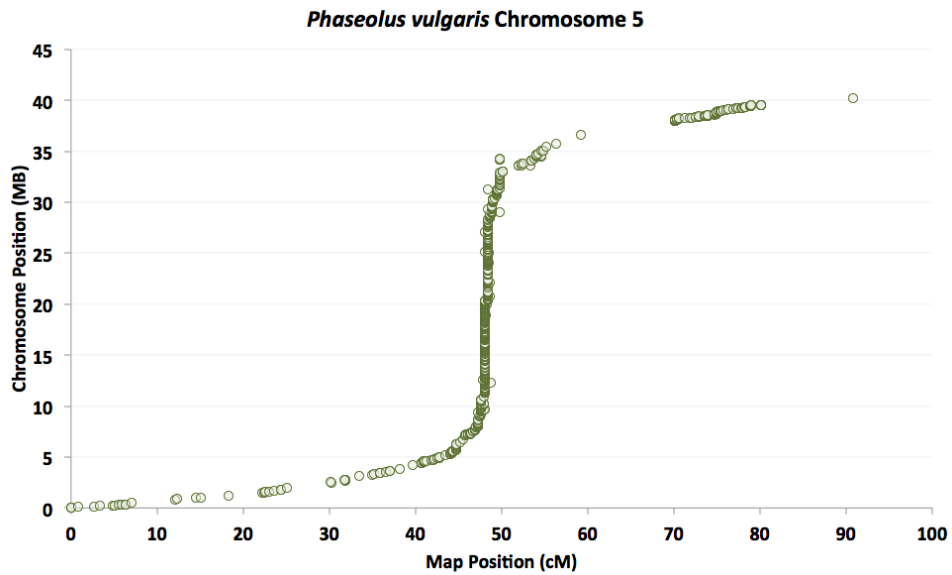

**Supplementary Figure 8:** Marker placements for the genetic map on the *Phaseolus vulgaris* chromosome 5.

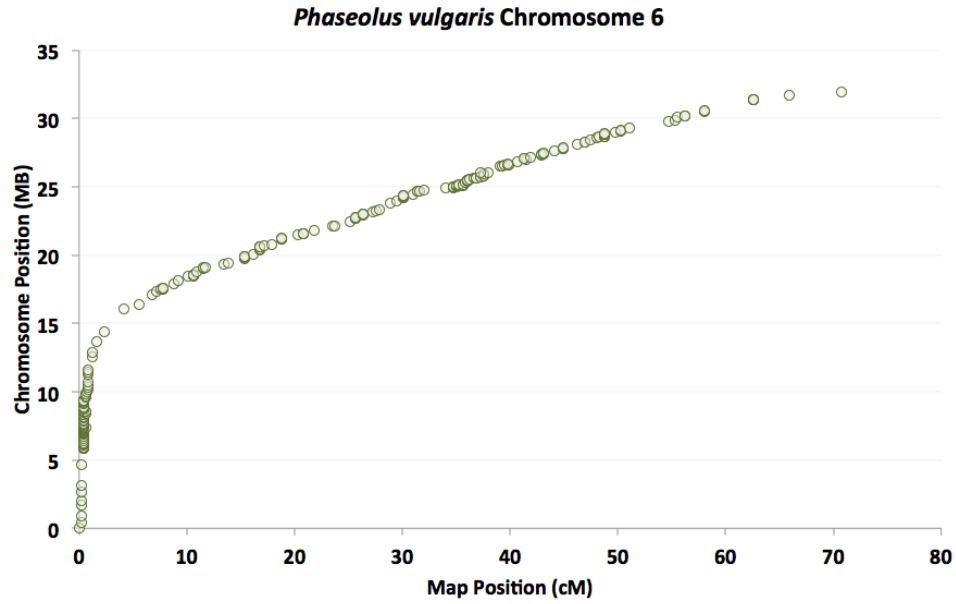

**Supplementary Figure 9:** Marker placements for the genetic map on the *Phaseolus vulgaris* chromosome 6.

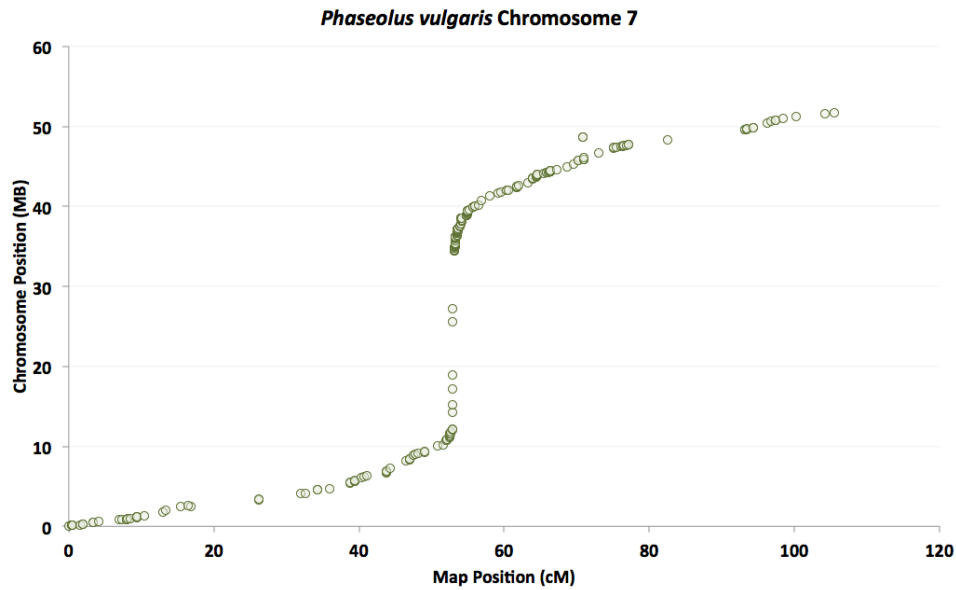

**Supplementary Figure 10:** Marker placements for the genetic map on the *Phaseolus vulgaris* chromosome 7.

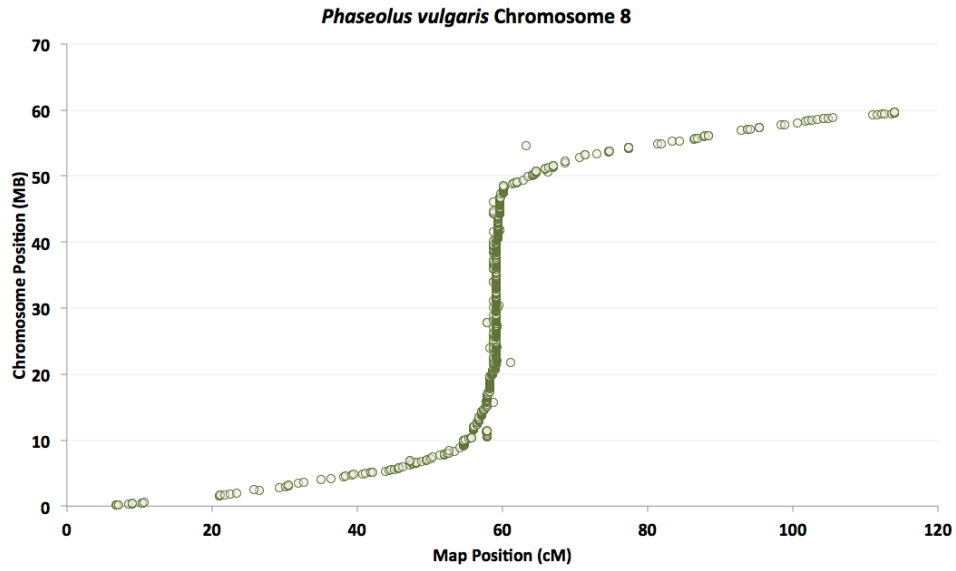

**Supplementary Figure 11:** Marker placements for the genetic map on the *Phaseolus vulgaris* chromosome 8.

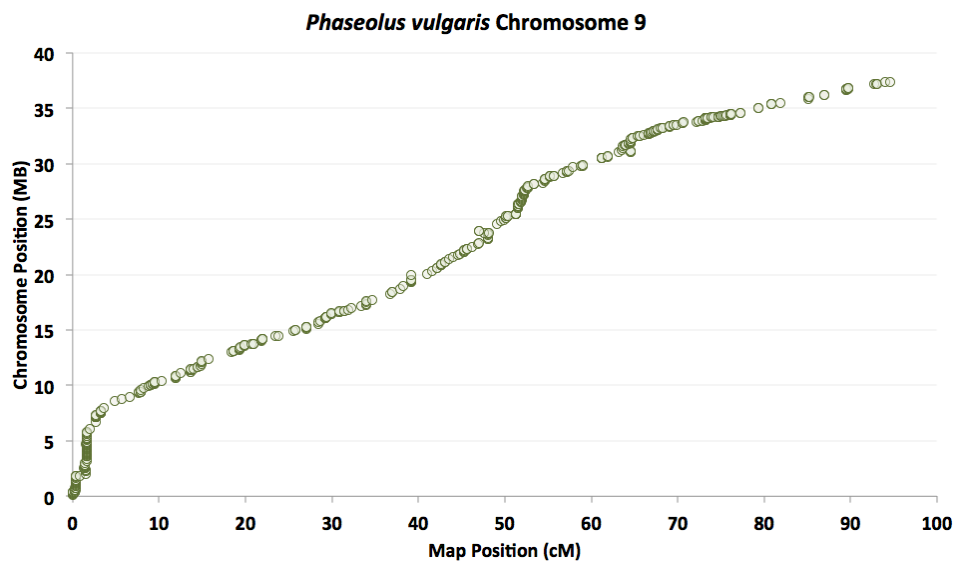

**Supplementary Figure 12:** Marker placements for the genetic map on *Phaseolus vulgaris* chromosome 9.

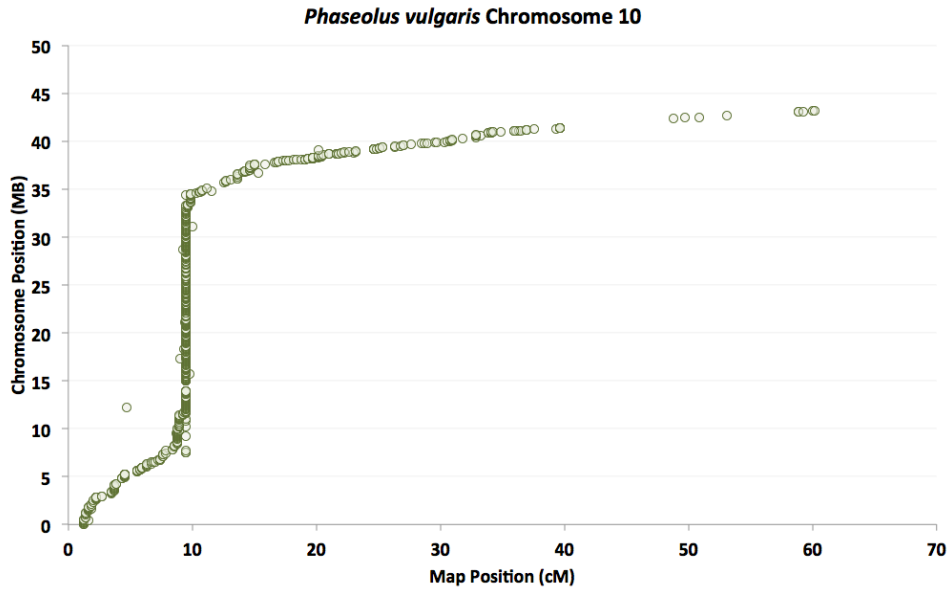

**Supplementary Figure 13:** Marker placements for the genetic map on *Phaseolus vulgaris* chromosome 10.

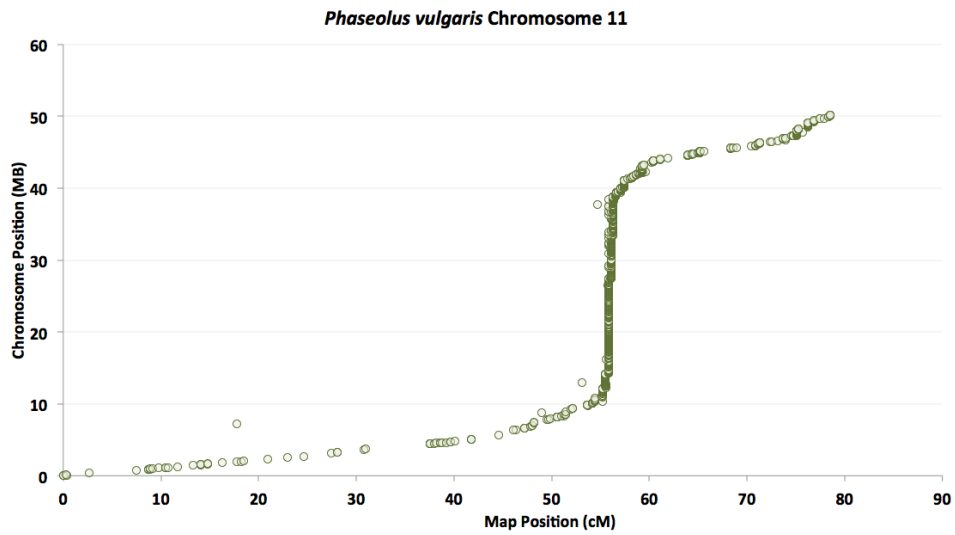

**Supplementary Figure 14:** Marker placements for the genetic map on *Phaseolus vulgaris* chromosome 11.



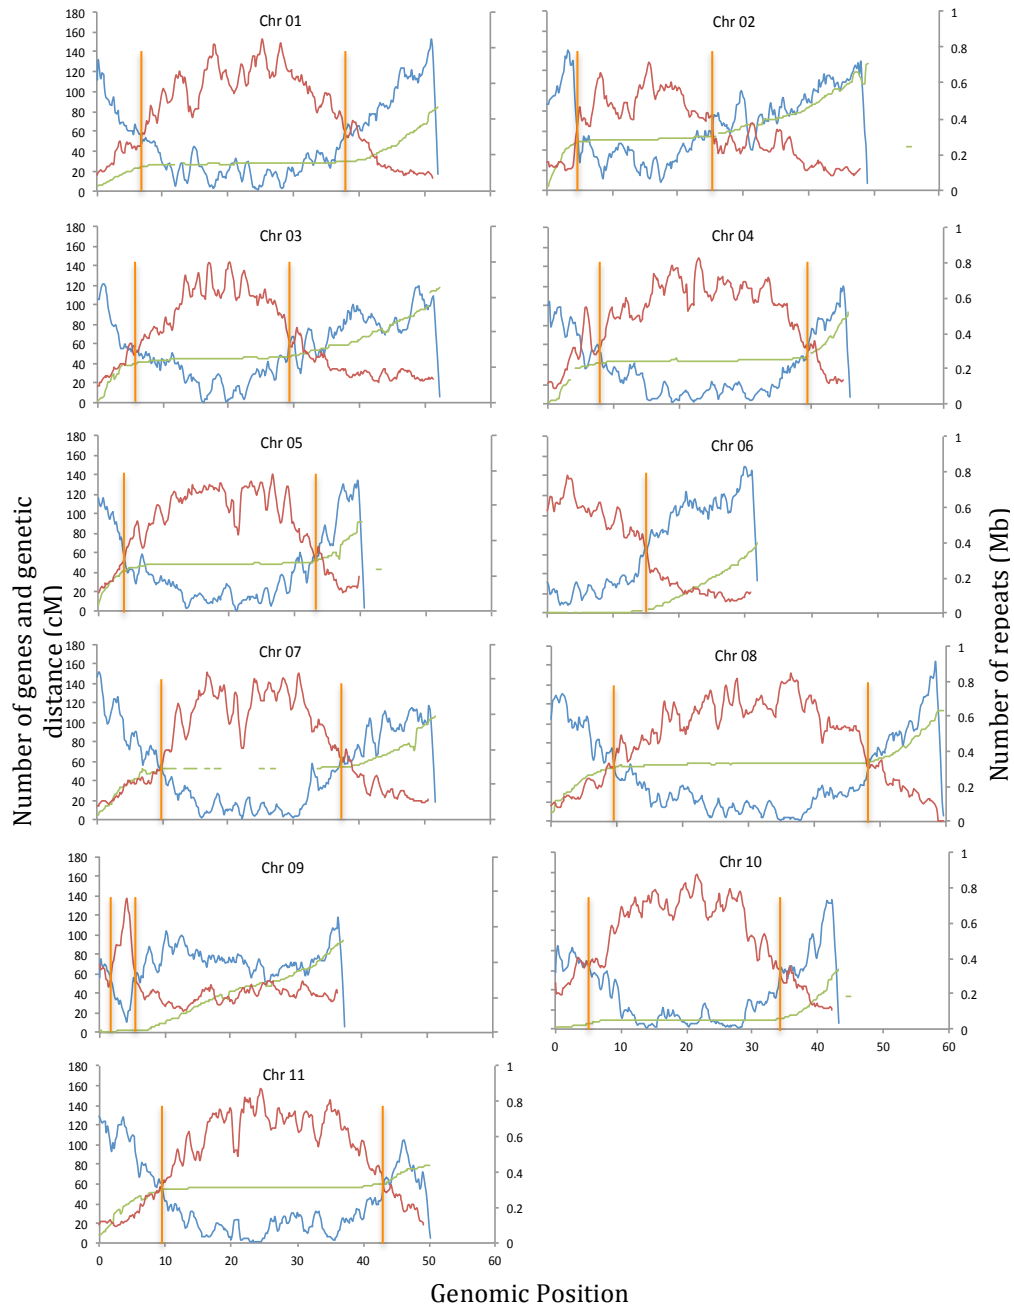

**Supplementary Figure 15.** Identification of pericentromeric regions. Identification of pericentromeric regions. Based on the comparison between physical distance (X axis) with gene density (blue line, left Y axis), repeats density (red line, right Y axis) and average of genetic distance (green line, left Y axis). Yellow vertical bars indicate position of transition from euchromatic arms to pericentromeres. All measures are based in a 1Mb window increasing every 200 kb. The gene density includes 27,197 genes and the genetic distance is based on 6,945 markers mapped in the Stampede x Redhawk population in a F<sub>2</sub> generation.

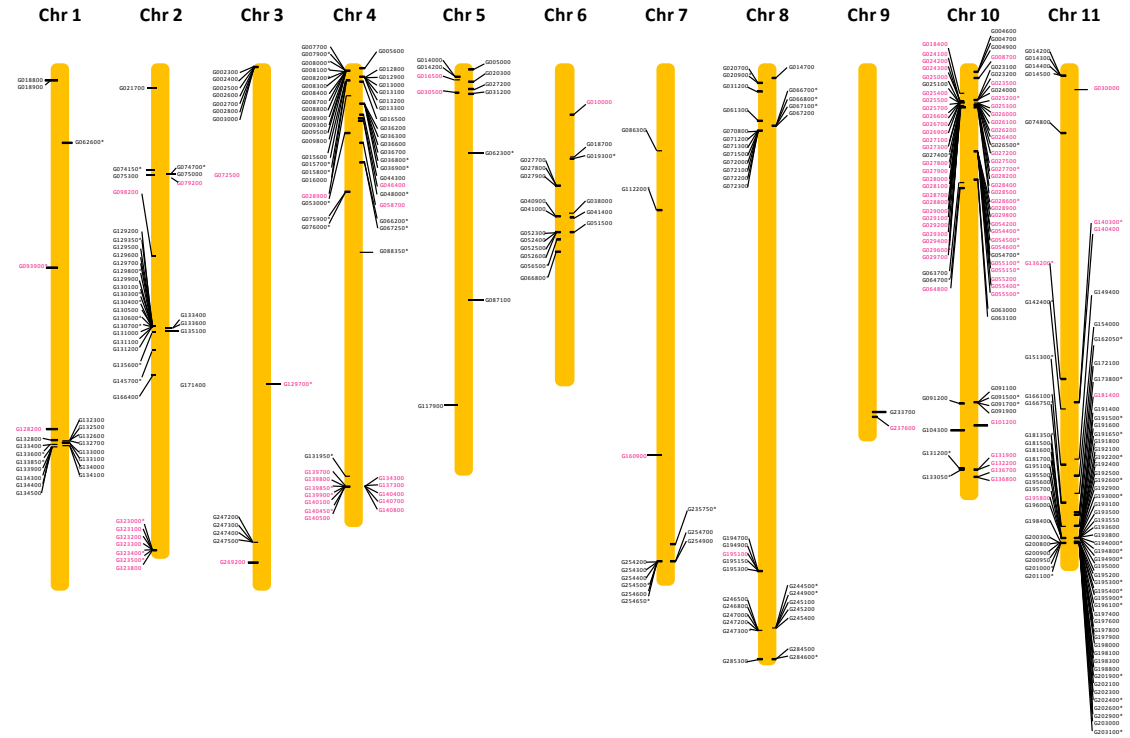

**Supplementary Figure 16.** Physical map of the 11 common bean chromosomes with individual CNLs and TNLs. The relative map position of 376 NL encoding genes is shown on the individual pseudomolecules depicting the chromosomes 1-11. Each gene has a unique label representing the 7 last informative digits from the annotation. For example, G002600 located on pseudomolecule 3 corresponds to the gene Phvul.003G002600. Genes encoded by the positive DNA strand are depicted on the right side of the chromosome, whereas those encoded by the negative strand are shown on the left. TNL sequences are presented in pink and CNL sequences are presented in black. NL corresponding to a pseudogene are denoted by an asterisk (\*) after their name.

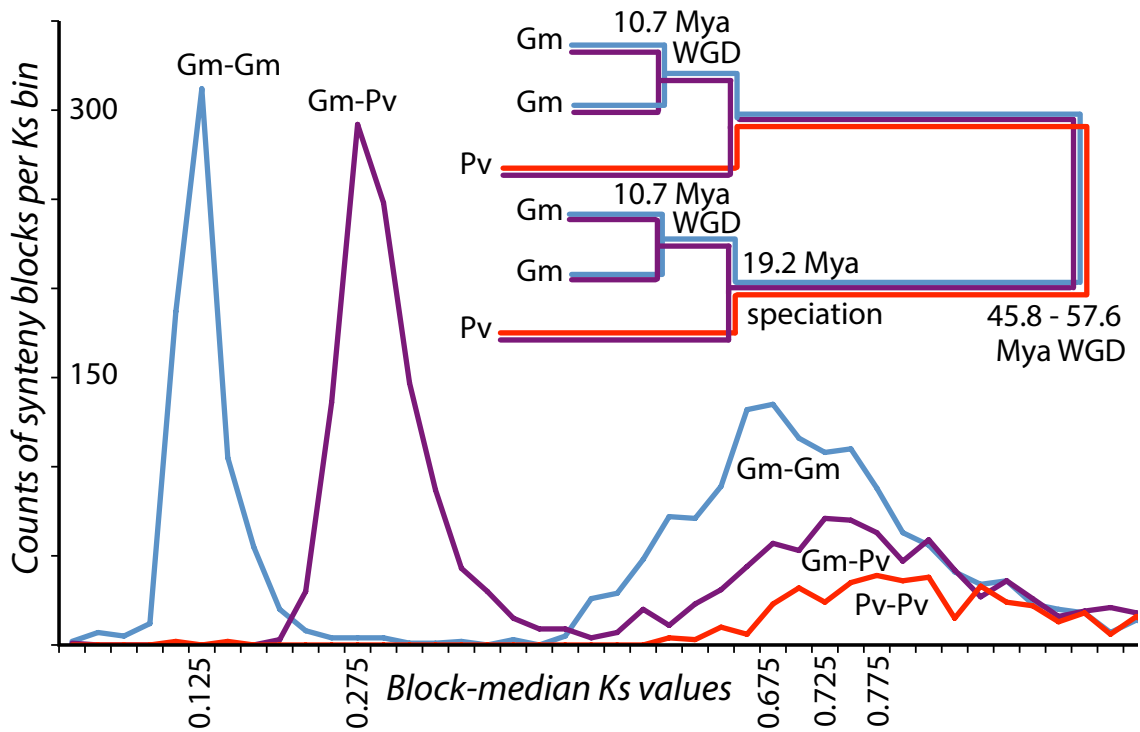

**Supplementary Figure 17.** Gene duplications and divergence estimates. Observed  $K_s$  values and inferred speciation and gene duplication divergence estimates, based on median synonymous substitutions values ( $K_s$ ) of synteny-block-median  $K_s$  values from gene pairs from syntenic regions. A system of equations corresponding to branches on gene-pair lineages (red, blue, or purple) was used to determine the branch lengths in this gene-family model. Rates of substitutions are based on the divergence time estimated by Lavin et al. (2005) for *Phaseolus* and *Glycine* of 19.2 Mya.

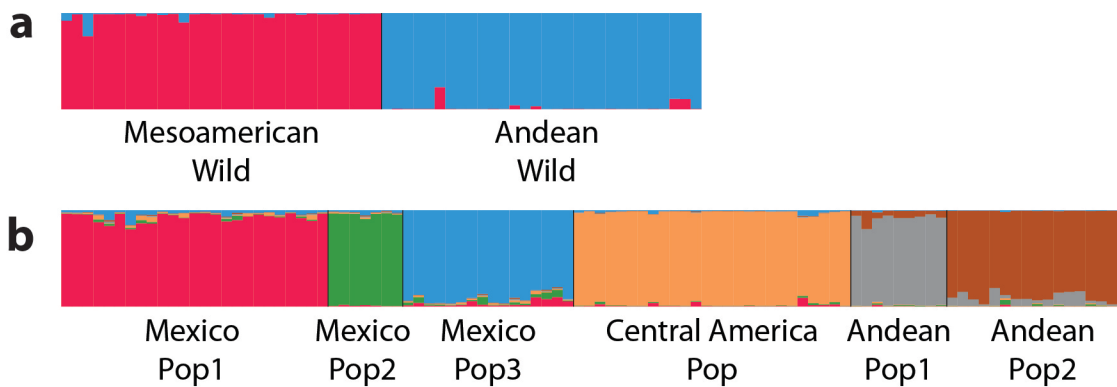

**Supplementary Figure 18.** Population substructure of 60 wild and 100 landrace common bean genotypes used for pooled resequencing. Population membership was defined using the STRUCTURE software. Based on historical research, the wild genotypes (a) were subdivided into two subpopulations, while the landraces (b) were defined by six subpopulations.

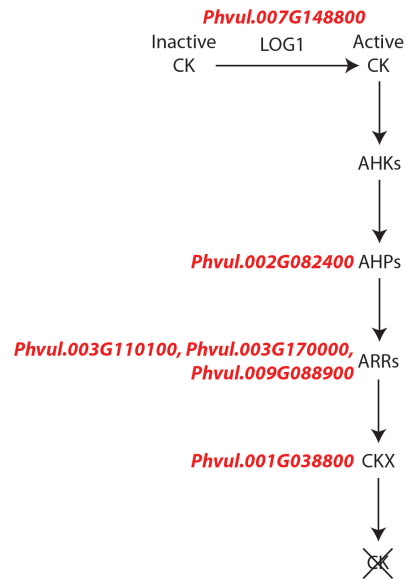

**Supplementary Figure 19.** Cytokinin pathway and MA domestication genes. Cytokinin is synthesized from a precursor by the enzyme LOG1. It is then sensed by members of the AHK class that autophosphorylate themselves. The phosphate group is passed to AHP proteins that migrate to the nucleus and phosphorylate ARR proteins. These transcription factors in turn activate genes such as CKX that degrades cytokinin to modulate the effects of the hormone on multiple plant development processes (Hwang et al. 2012). The MA domestication candidates for genes in the pathway are noted.



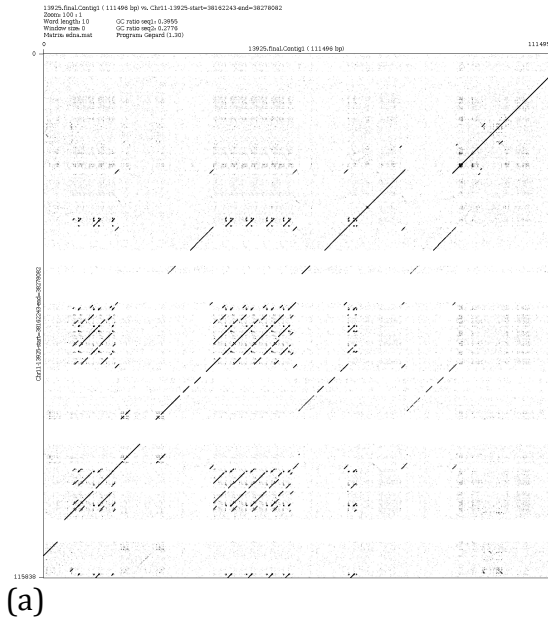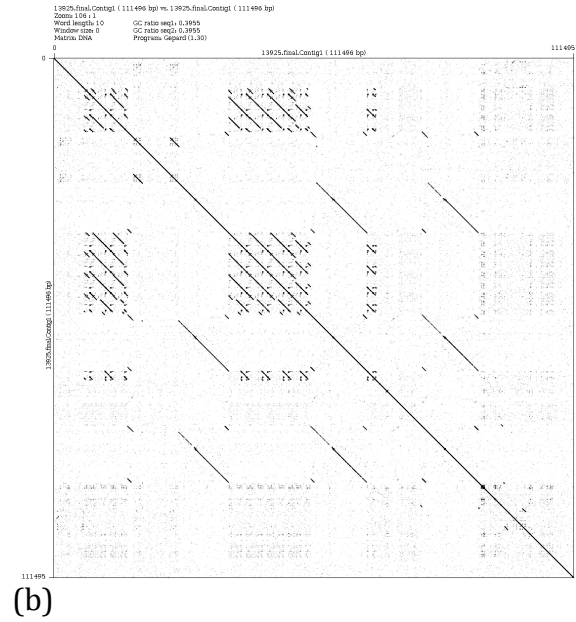

**Supplementary Figure 22:** Dot plot of BAC clone 13925 on a region of chromosome Pv11. This alignment is representative of a BAC clone in a dense transposon environment, where (a) is the alignment on Chr11 and (b) is the dot plot of the clone with itself.

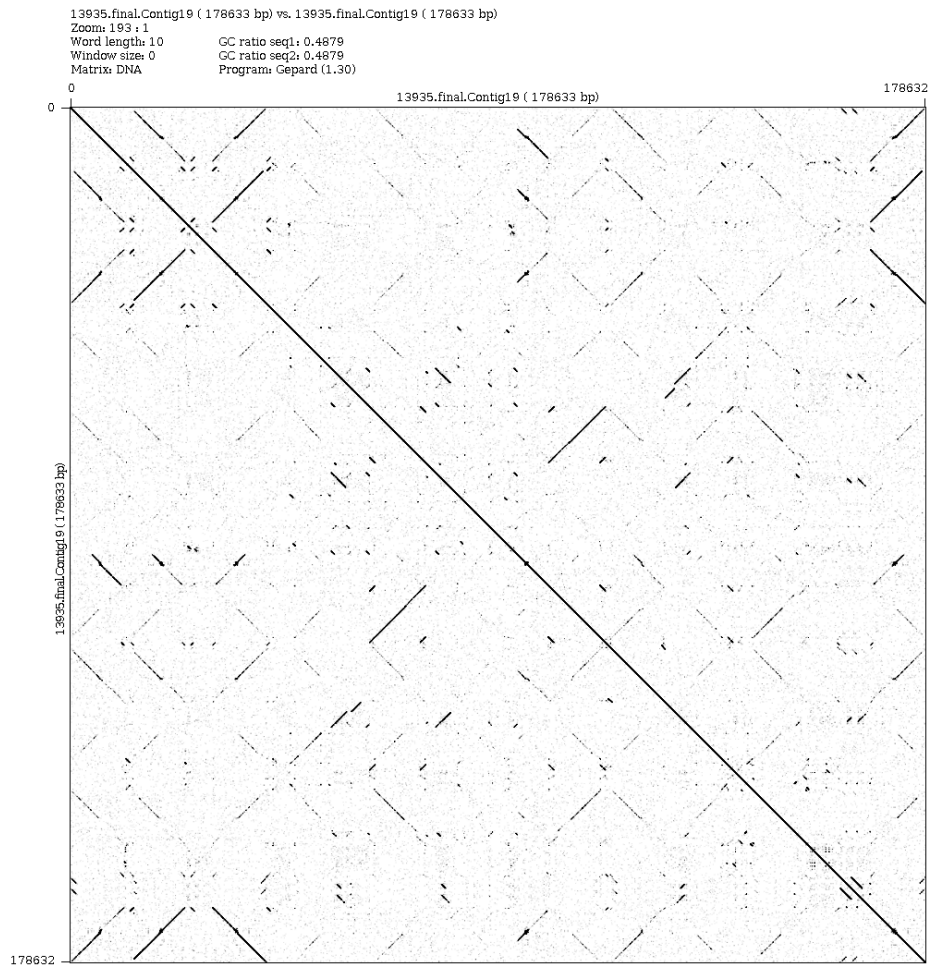

**Supplementary Figure 23:** Dot plot of BAC clone 13935 with itself. This clone likely resides in a region of the genome that was not resolved in the assembly.

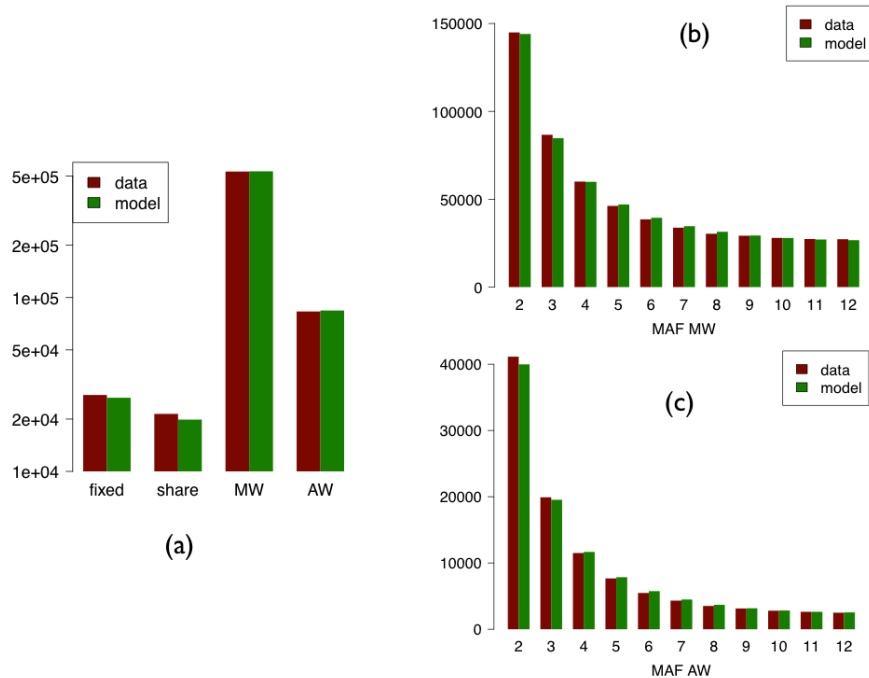

**Supplementary Figure 24.** Data vs model prediction for the genetic variation in the two wild bean pools of wild Mesoamerican (MW) and wild Andean (AW). Each pool has been down-sampled to 25 chromosomes. Singletons in both pools have been excluded in model inference and prediction. (a) The summary statistic of 4 types of mutually exclusive single nucleotide variants: fixed=sites with 2 alleles separately fixed in MW and AW, share=sites variant in both pools, MW=sites variant in MW only, AW=sites variant in AW only. (b) Minor allele frequency distribution for the MW pool. (c) Minor allele frequency distribution in the AW pool with sample size 25.



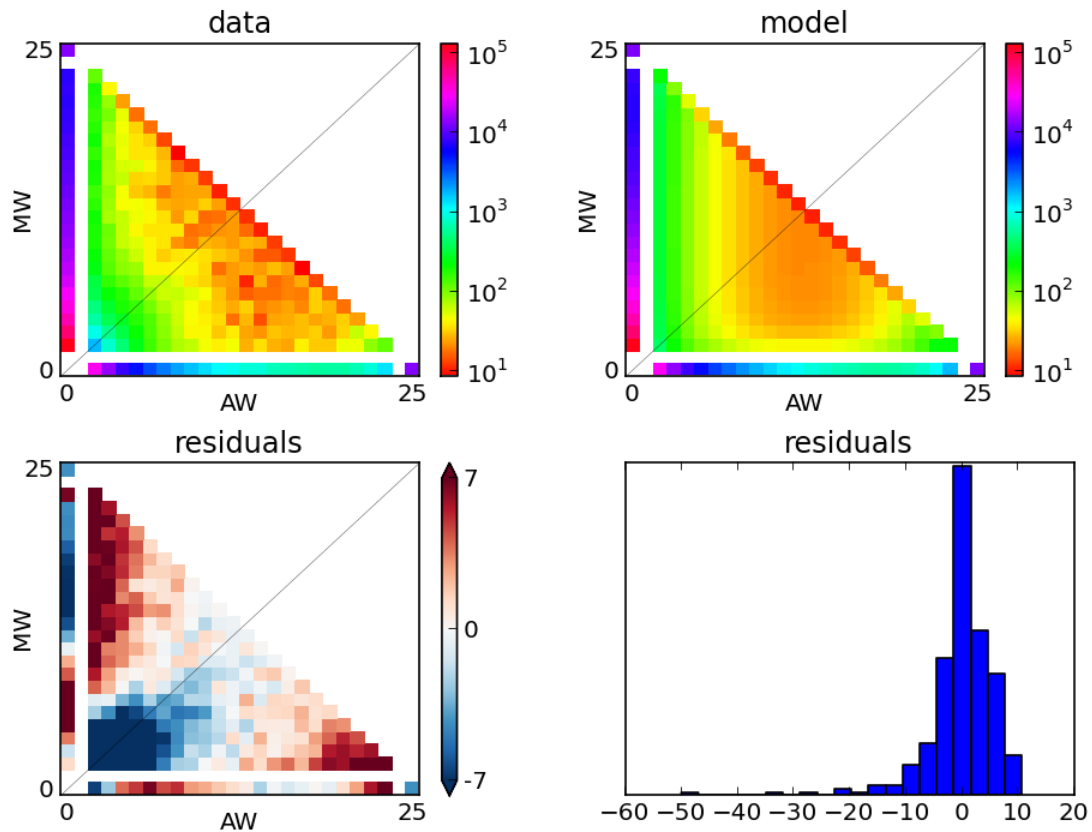

**Supplementary Figure 25.** Joint allele frequency spectrum for the two wild pools of common bean. The pooled data were down-sampled to 25 chromosomes for each pool, and singletons were excluded both in model inference and prediction. The Anscombe residuals between the best fit model and data are shown in the bottom row. See test for discussions. MW=wild Mesoamerican, AW=wild Andean.

## B. Supplementary Tables

| Library      | Sequencing Platform | Average Read Length/Insert Size | Read Number | Assembled Sequence Coverage |
|--------------|---------------------|---------------------------------|-------------|-----------------------------|
| Linear       | 454 XLR & FLX+      | 362 <sup>*</sup>                | 38,107,155  | 18.64x                      |
| GPNB         | 454 XLR paired      | 2,798 ± 1,047                   | 589,346     | 0.11x                       |
| GGAS         | 454 XLR paired      | 3,922 ± 643                     | 1,940,576   | 0.41x                       |
| GXSF         | 454 XLR paired      | 3,991 ± 337                     | 467,414     | 0.07x                       |
| HYFA         | 454 XLR paired      | 4,729 ± 497                     | 1,648,022   | 0.25x                       |
| HYFC         | 454 XLR paired      | 4,736 ± 504                     | 1,491,648   | 0.24x                       |
| HYFB         | 454 XLR paired      | 4,759 ± 528                     | 1,196,104   | 0.17x                       |
| HXTI         | 454 XLR paired      | 8,022 ± 1,016                   | 1,364,808   | 0.22x                       |
| GXNX         | 454 XLR paired      | 9,192 ± 1,058                   | 878,832     | 0.16x                       |
| HXWF         | 454 XLR paired      | 11,903 ± 1,928                  | 724,196     | 0.13x                       |
| HXWH         | 454 XLR paired      | 12,231 ± 1,902                  | 413,396     | 0.08x                       |
| VUK          | Sanger              | 34,956 ± 4,536                  | 240,384     | 0.20x                       |
| VUL          | Sanger              | 36,001 ± 4,632                  | 88,320      | 0.08x                       |
| PVC          | Sanger              | 121,960 ± 16,572                | 81,408      | 0.08x                       |
| PVA          | Sanger              | 126,959 ± 25,658                | 89,017      | 0.09x                       |
| PVB          | Sanger              | 135,292 ± 21,487                | 92,160      | 0.09x                       |
| <b>Total</b> |                     |                                 | 49,412,786  | 21.02x                      |

**Supplementary Table 1.** Genomic libraries included in the *Phaseolus vulgaris* genome assembly and their respective assembled sequence coverage levels in the final release. <sup>\*</sup>Indicates that the number reported in the table is the average read length, not insert size.

| <b>Minimum Scaffold Length</b> | <b>Number of Scaffolds</b> | <b>Number of Contigs</b> | <b>Scaffold Size</b> | <b>Basepairs</b> | <b>% Non-gap Basepairs</b> |
|--------------------------------|----------------------------|--------------------------|----------------------|------------------|----------------------------|
| 5 Mb                           | 36                         | 24,903                   | 310,700,332          | 284,755,606      | 91.65%                     |
| 2.5 Mb                         | 65                         | 33,373                   | 418,546,348          | 382,376,028      | 91.36%                     |
| 1 Mb                           | 109                        | 38,683                   | 497,761,392          | 454,793,715      | 91.37%                     |
| 500 Kb                         | 122                        | 39,252                   | 507,057,583          | 463,387,171      | 91.39%                     |
| 250 Kb                         | 136                        | 39,730                   | 512,032,524          | 466,907,449      | 91.19%                     |
| 100 Kb                         | 157                        | 40,017                   | 515,361,076          | 468,917,527      | 90.99%                     |
| 50 Kb                          | 171                        | 40,169                   | 516,398,703          | 469,738,390      | 90.96%                     |
| 25 Kb                          | 213                        | 40,452                   | 517,980,937          | 470,824,917      | 90.90%                     |
| 10 Kb                          | 289                        | 40,740                   | 519,103,479          | 471,766,339      | 90.88%                     |
| 5 Kb                           | 479                        | 41,194                   | 520,388,386          | 472,773,109      | 90.85%                     |
| 2.5 Kb                         | 641                        | 41,453                   | 521,017,136          | 473,245,231      | 90.83%                     |
| 1 Kb                           | 1,100                      | 41,920                   | 521,675,054          | 473,897,487      | 90.84%                     |
| 0 bp                           | 1,627                      | 42,447                   | 522,065,413          | 474,287,846      | 90.85%                     |

**Supplementary Table 2.** Summary statistics of the output of the whole genome shotgun assembly prior to screening, removal of organelles and contaminating scaffolds and chromosome-scale pseudomolecule construction. The table shows total contigs and total assembled basepairs for each set of scaffolds greater than the size listed in the left hand column.

|                                |                     |
|--------------------------------|---------------------|
| <b>Scaffold total</b>          | 708                 |
| <b>Contig total</b>            | 41,391              |
| <b>Scaffold sequence total</b> | 521.1 Mb            |
| <b>Contig sequence total</b>   | 472.5 Mb (1.7% gap) |
| <b>Scaffold N50/L50</b>        | 5/50.4 Mb           |
| <b>Contig N50/L50</b>          | 3,273/39.5 Kb       |

**Supplementary Table 3.** Final summary assembly statistics for chromosome scale assembly.

| <b>Resource type</b> | <b>Tissue Type</b>                 | <b>Number of reads</b> | <b>GSNAP (Wu and Nacu 2010) Aligned</b> | <b>Percent Aligned</b> |
|----------------------|------------------------------------|------------------------|-----------------------------------------|------------------------|
| Sanger               | Mixed                              | 79,630                 | -                                       | -                      |
| Illumina 2x100 bp    | Roots 10 DAP (days after planting) | 65,429,570             | 59,846,373                              | 92.1%                  |
| Illumina 2x100 bp    | Roots 19 DAP                       | 46,593,274             | 44,116,235                              | 94.9%                  |
| Illumina 2x100 bp    | Nodules 19 DAP                     | 71,716,844             | 66,112,750                              | 92.7%                  |
| Illumina 2x100 bp    | Stem 10 DAP                        | 40,933,844             | 38,196,918                              | 93.6%                  |
| Illumina 2x100 bp    | Stem 19 DAP                        | 61,842,390             | 44,116,235                              | 94.9%                  |
| Illumina 2x100 bp    | Primary leaves 10 DAP              | 68,255,918             | 61,371,430                              | 90.5%                  |
| Illumina 2x100 bp    | Young trifoliates 19 DAP           | 66,127,642             | 60,209,317                              | 91.6%                  |
| Illumina 2x100 bp    | Flower buds                        | 68,363,986             | 61,332,231                              | 90.5%                  |
| Illumina 2x100 bp    | Whole Flowers                      | 66,112,818             | 62,126,340                              | 94.7%                  |
| Illumina 2x100 bp    | Young pods 1-5cm seedless          | 66,133,582             | 62,301,836                              | 94.8%                  |
| Illumina 2x150 bp    | Green mature pods 11.5-13.5 cm     | 120,724,870            | 113,736,673                             | 94.6%                  |
| <b>Total RNA-Seq</b> |                                    | 742,234,738            | 687,643,736                             | 93.2%                  |

**Supplementary Table 4.** Transcript resources used for annotation for *Phaseolus vulgaris*.

|                                    |        |
|------------------------------------|--------|
| Primary loci                       | 27,197 |
| Alternative transcripts            | 4,491  |
| Average number of exons            | 5.5    |
| Median exon length                 | 160    |
| Median intron length               | 200    |
| Complete genes                     | 26,279 |
| Incomplete genes with start codon  | 225    |
| Incomplete genomes with stop codon | 657    |

**Supplementary Table 5.** Annotation results

| Chr         | Centromeric regions |      |           |       | Pericentromeric regions |      |       |
|-------------|---------------------|------|-----------|-------|-------------------------|------|-------|
|             | Start               | End  | Mid point | Range | Start                   | End  | Range |
| <b>Pv1</b>  | 12.2                | 19.9 | 16.1      | 7.7   | 6.8                     | 38.0 | 31.2  |
| <b>Pv2</b>  | 5.4                 | 10.0 | 7.7       | 4.6   | 4.5                     | 25.5 | 21.0  |
| <b>Pv3</b>  | 14.8                | 16.9 | 15.8      | 2.1   | 6.0                     | 29.5 | 23.5  |
| <b>Pv4</b>  | 15.7                | 22.2 | 19.0      | 6.5   | 8.0                     | 39.5 | 31.5  |
| <b>Pv5</b>  | 15.3                | 22.7 | 19.0      | 7.5   | 4.0                     | 33.8 | 29.8  |
| <b>Pv6</b>  | 2.6                 | 2.7  | 2.7       | 0.1   | 0.0                     | 15.0 | 15.0  |
| <b>Pv7</b>  | 16.7                | 30.3 | 23.5      | 13.6  | 9.8                     | 37.5 | 27.7  |
| <b>Pv8</b>  | 24.3                | 38.2 | 31.2      | 13.9  | 9.8                     | 48.0 | 38.2  |
| <b>Pv9</b>  | 1.5                 | 5.8  | 3.7       | 4.3   | 1.5                     | 5.8  | 4.3   |
| <b>Pv10</b> | 30.6                | 31.3 | 31.0      | 0.7   | 5.2                     | 34.0 | 28.8  |
| <b>Pv11</b> | 16.0                | 17.1 | 16.6      | 1.0   | 9.8                     | 43.0 | 33.2  |

**Supplementary Table 6.** Start and end points of centromeric regions in Mb based on BLASTN of CentPv1 and CentPv2 repeats. Start and end point of pericentromeric regions in Mb identified following the plots on Supplementary Figure 15.

|              | <b>Genetic Length (cM)</b> | <b>Physical length (Kb)</b> | <b>Kb/cM Pericentromere</b> | <b>Kb/cM euchromartic arms</b> | <b>Kb/cM per chromosome</b> |
|--------------|----------------------------|-----------------------------|-----------------------------|--------------------------------|-----------------------------|
| <b>Chr01</b> | 84.0                       | 52183.5                     | 5210                        | 278                            | 651.5                       |
| <b>Chr02</b> | 127.6                      | 49033.7                     | 3084                        | 233                            | 384.2                       |
| <b>Chr03</b> | 116.9                      | 52218.6                     | 3452                        | 262                            | 445.6                       |
| <b>Chr04</b> | 94.0                       | 45793.2                     | 4701                        | 164                            | 486.7                       |
| <b>Chr05</b> | 90.8                       | 40237.5                     | 2342                        | 134                            | 443.0                       |
| <b>Chr06</b> | 70.8                       | 31973.2                     | 6102                        | 239                            | 451.3                       |
| <b>Chr07</b> | 105.4                      | 51698.4                     | 9179                        | 233                            | 489.7                       |
| <b>Chr08</b> | 114.0                      | 59634.6                     | 6913                        | 208                            | 554.7                       |
| <b>Chr09</b> | 94.6                       | 37399.6                     | 3322                        | 352                            | 394.0                       |
| <b>Chr10</b> | 60.2                       | 43213.2                     | 5388                        | 267                            | 732.1                       |
| <b>Chr11</b> | 78.5                       | 50203.6                     | 5877                        | 232                            | 638.9                       |
| <b>Mean</b>  | <b>94.3</b>                | <b>46689.9</b>              | <b>5052</b>                 | <b>237</b>                     | <b>515.6</b>                |

**Supplementary Table 7.** Physical (Kb) and genetic (cM) position of the last marker mapped in each chromosome and recombination rate (Kb/cM) per chromosome and comparison between pericentromeric regions and euchromatic arms.



| <b>Super families of TEs</b> | <b>Number of TEs (X10<sup>3</sup>)</b> | <b>Coverage of TEs (bp)</b> | <b>Fraction of genome (%)</b> |
|------------------------------|----------------------------------------|-----------------------------|-------------------------------|
| Class 1                      | 281.3                                  | 185,960,175                 | 39.36                         |
| LTR                          | 242.9                                  | 173,201,891                 | 36.66                         |
| retrotransposon              |                                        |                             |                               |
| Ty3-gypsy                    | 145.1                                  | 118,698,650                 | 25.12                         |
| Ty1-copia                    | 61.2                                   | 44,242,298                  | 9.37                          |
| others                       | 36.6                                   | 10,260,943                  | 2.18                          |
| LINEs                        | 37.5                                   | 12,599,869                  | 2.67                          |
| SINEs                        | 1.0                                    | 158,415                     | 0.03                          |
| Class 2                      | 87.1                                   | 25,979,571                  | 5.50                          |
| CACTA                        | 43.9                                   | 12,726,168                  | 2.69                          |
| Harbinger/PIF                | 0.5                                    | 264,755                     | 0.06                          |
| hAT                          | 3.9                                    | 1,028,733                   | 0.22                          |
| Helitron                     | 18.2                                   | 5,037,722                   | 1.07                          |
| MULE                         | 20.6                                   | 6,922,193                   | 1.46                          |
| Unclassified TEs             | 14.7                                   | 2,680,413                   | 0.57                          |
| <b>Total</b>                 | <b>383.2</b>                           | <b>21,4620,159</b>          | <b>45.42</b>                  |

**Supplementary Table 8.** Summary of transposable elements (TEs) in *Phaseolus vulgaris*.

| Chromosomes | Sizes (bp) | Retrotransposons           |               |              | DNA transposons            |               |              | All transposons            |               |              |
|-------------|------------|----------------------------|---------------|--------------|----------------------------|---------------|--------------|----------------------------|---------------|--------------|
|             |            | Number (X10 <sup>3</sup> ) | Coverage (bp) | Fraction (%) | Number (X10 <sup>3</sup> ) | Coverage (bp) | Fraction (%) | Number (X10 <sup>3</sup> ) | Coverage (bp) | Fraction (%) |
| Chr1        | 47,951,512 | 28.8                       | 18,720,056    | 39.0         | 8.5                        | 2,566,290     | 5.35         | 38.8                       | 21,562,140    | 45.0         |
| Chr2        | 45,612,791 | 23.4                       | 12,946,998    | 28.39        | 8.2                        | 2,299,629     | 5.04         | 33.2                       | 15,522,579    | 34.03        |
| Chr3        | 48,183,191 | 25.5                       | 15,542,892    | 32.26        | 9.3                        | 2,614,464     | 5.43         | 36.6                       | 18,485,093    | 38.36        |
| Chr4        | 41,235,254 | 27.6                       | 18,829,670    | 45.67        | 8.3                        | 2,518,111     | 6.11         | 37.0                       | 21,546,355    | 52.25        |
| Chr5        | 36,832,944 | 24.2                       | 16,333,307    | 44.24        | 6.9                        | 2,106,756     | 5.72         | 32.3                       | 18,644,314    | 50.62        |
| Chr6        | 29,540,412 | 15.6                       | 9,103,879     | 30.82        | 5.3                        | 1,524,163     | 5.16         | 21.8                       | 10,796,910    | 36.55        |
| Chr7        | 47,238,532 | 26.5                       | 18,256,201    | 38.65        | 7.9                        | 2,347,605     | 4.97         | 35.82                      | 20,861,506    | 44.16        |
| Chr8        | 53,869,949 | 34.2                       | 23,124,655    | 42.93        | 9.6                        | 2,880,029     | 5.35         | 45.3                       | 26,275,208    | 48.78        |
| Chr9        | 35,032,714 | 16.3                       | 7,273,948     | 20.76        | 7.2                        | 1,827,118     | 5.22         | 25.2                       | 9,372,017     | 26.75        |
| Chr10       | 38,134,409 | 25.7                       | 18,585,806    | 48.74        | 7.1                        | 2,254,243     | 5.91         | 33.7                       | 21,012,489    | 55.10        |
| Chr11       | 44,565,803 | 29.8                       | 20,779,963    | 36.63        | 8.0                        | 2,466,887     | 5.54         | 39.1                       | 23,489,119    | 52.71        |

**Supplementary Table 9.** Transposon distribution across the 11 chromosomes of *Phaseolus vulgaris*.

|               | #Full length | #Pseudo    | #Total     | %            |
|---------------|--------------|------------|------------|--------------|
| <b>TNL</b>    | <b>82</b>    | <b>24</b>  | <b>106</b> | <b>28.2%</b> |
| TIR-NB-LRR    | 73           | 20         | 93         |              |
| TIR-NB        | 9            | 4          | 13         |              |
| <b>CNL</b>    | <b>185</b>   | <b>85</b>  | <b>270</b> | <b>71.8%</b> |
| CN            | 3            | 1          | 4          |              |
| N             | 5            | 2          | 7          |              |
| NL            | 91           | 64         | 155        |              |
| CNL           | 86           | 18         | 104        |              |
| <b>#Total</b> | <b>267</b>   | <b>109</b> | <b>376</b> |              |

**Supplementary Table 10.** Numbers of common bean genes that encodes domains similar to plant R proteins

|              | Pv<br>total<br>genes | Pv<br>synteny<br>genes | Gm A  | Gm B  | Lost in<br>A or B | Retained<br>in A or B | % Gm<br>A | %Gm B | Ratio<br>A:B |
|--------------|----------------------|------------------------|-------|-------|-------------------|-----------------------|-----------|-------|--------------|
| <b>Pv01</b>  | 2694                 | 2116                   | 1971  | 1888  | 373               | 1743                  | 93%       | 89%   | 1.04         |
| <b>Pv02</b>  | 3338                 | 2695                   | 2426  | 2451  | 513               | 2182                  | 90%       | 91%   | 0.99         |
| <b>Pv03</b>  | 2973                 | 2294                   | 2112  | 1894  | 582               | 1712                  | 92%       | 83%   | 1.12         |
| <b>Pv04</b>  | 1789                 | 1035                   | 908   | 902   | 260               | 775                   | 88%       | 87%   | 1.01         |
| <b>Pv05</b>  | 1863                 | 1349                   | 1198  | 1139  | 361               | 988                   | 89%       | 84%   | 1.05         |
| <b>Pv06</b>  | 2221                 | 1649                   | 1508  | 1417  | 373               | 1276                  | 91%       | 86%   | 1.06         |
| <b>Pv07</b>  | 2812                 | 2146                   | 1961  | 1920  | 411               | 1735                  | 91%       | 89%   | 1.02         |
| <b>Pv08</b>  | 2932                 | 2067                   | 1873  | 1810  | 451               | 1616                  | 91%       | 88%   | 1.03         |
| <b>Pv09</b>  | 2633                 | 2134                   | 1947  | 1945  | 376               | 1758                  | 91%       | 91%   | 1.00         |
| <b>Pv10</b>  | 1659                 | 1020                   | 933   | 890   | 217               | 803                   | 91%       | 87%   | 1.05         |
| <b>Pv11</b>  | 2168                 | 1274                   | 1177  | 1055  | 316               | 958                   | 92%       | 83%   | 1.12         |
| <b>Total</b> | 27082                | 19779                  | 18014 | 17311 | 4233              | 15548                 |           |       |              |
| <b>Mean</b>  | 2462                 | 1798                   | 1638  | 1574  | 385               | 1413                  |           |       |              |

**Supplementary Table 11.** *Phaseolus* synteny genes and their corresponding chromosomes in *Glycine*. Lost and retained genes in *Glycine* homolog chromosomes with based on *Phaseolus* genes. (% of GmA and GmB were calculated over the total number of genes in synteny blocks per chromosome.)

| <b>Pool definition (abbreviation)</b> | <b>Genepool</b> | <b>Pool size</b> | <b>Sequence collected in GB</b> | <b>Diploid genome equivalents</b> |
|---------------------------------------|-----------------|------------------|---------------------------------|-----------------------------------|
| Landrace Mexico 1                     | Meso            | 25               | 153.2                           | 6.1x                              |
| Landrace Mexico 2                     | Meso            | 7                | 47.9                            | 6.8x                              |
| Landrace Mexico 3                     | Meso            | 16               | 102.9                           | 6.4x                              |
| Landrace Central America              | Meso            | 26               | 136.8                           | 5.3x                              |
| Landrace South Andes                  | Andean          | 9                | 63.7                            | 7.1x                              |
| Landrace North Andes                  | Andean          | 17               | 57.2                            | 3.4x                              |
| Wild Mesoamerican                     | Meso            | 30               | 161.5                           | 5.4x                              |
| Wild Andean                           | Andean          | 30               | 147.4                           | 4.9x                              |

**Supplementary Table 12.** *Phaseolus vulgaris* race and wild pool resequencing

|                                | 95% confidence intervals | un-bootstrapped fit |
|--------------------------------|--------------------------|---------------------|
| $M12=2*N_{anc}*m12$            | 0.072 - 0.1              | 0.087               |
| $M21=2*N_{anc}*m21$            | 0.12 - 0.152             | 0.135               |
| Ancestral population size      | 158900 - 176200          | 1.68E+05            |
| Divergence time (yr)           | 146200 - 183700          | 1.65E+05            |
| MW initial pop size            | 124900 - 205800          | 1.55E+05            |
| MW final pop size              | 463300 - 658300          | 5.61E+05            |
| AW bottleneck pop size         | 2304 - 8978              | 3.59E+03            |
| AW bottleneck duration (yr)    | 60370 - 99470            | 7.59E+04            |
| AW final effective pop size    | 188500 - 271300          | 2.19E+05            |
| AW exponential growth duration | 65500 - 99150            | 8.88E+04            |

**Supplementary Table 13.** Demographic model parameters for the divergence of the wild Mesoamerican and wild Andean bean pools. The confidence intervals were derived from 100 bootstrap replicates. A population size refers to the effective population size. For example, MW initial population size refers to the effective population size of the wild Mesoamerican pool right after its split from the wild Andean (AW) pool. M12 is the AW to MW population migration rate, and M21 is the MW to AW migration rate. A base substitution rate of  $8.46e-9$  /bp/yr is used. See

Fig. 1 for model illustration and text for details.

| <b>Population</b>              | <b>Population size</b> | <b># of SNPs in population</b> | <b># of SNPs in genes</b> | <b>% of SNPs in genes</b> |
|--------------------------------|------------------------|--------------------------------|---------------------------|---------------------------|
| <b>Middle American</b>         |                        |                                |                           |                           |
| Wild                           | 30                     | 8,890,318                      | 1,422,926                 | 16.01                     |
| All landraces                  | 74                     | 9,661,807                      | 1,487,930                 | 15.40                     |
| Mexican landraces              | 48                     | 9,420,133                      | 1,460,670                 | 15.51                     |
| Mexican sub population 1       | 25                     | 6,065,384                      | 949,620                   | 15.66                     |
| Mexican sub population 2       | 7                      | 5,843,761                      | 971,569                   | 16.63                     |
| Mexican sub population 3       | 16                     | 7,009,370                      | 1,113,682                 | 15.89                     |
| Central America sub population | 26                     | 5,046,476                      | 808,411                   | 16.02                     |
| <i>Andean</i>                  |                        |                                |                           |                           |
| Wild                           | 30                     | 2,837,493                      | 422,393                   | 14.89                     |
| All landraces                  | 26                     | 3,154,648                      | 522,897                   | 16.58                     |
| Andean sub population 1        | 9                      | 1,397,405                      | 221,196                   | 15.83                     |
| Andean sub population 2        | 17                     | 2,589,280                      | 439,086                   | 16.96                     |

**Supplementary Table 14.** SNP diversity among pooled sequencing populations.

| Population                      | 100kb/10kb |        |          |            | 10kb/2kb |        |          |            | Gene |        |          |            |
|---------------------------------|------------|--------|----------|------------|----------|--------|----------|------------|------|--------|----------|------------|
|                                 | SNP        | $\pi$  | $\theta$ | Tajima's D | SNP      | $\pi$  | $\theta$ | Tajima's D | SNP  | $\pi$  | $\theta$ | Tajima's D |
| <b>Ancestral wild</b>           | 1998       | 0.0057 | 0.0040   | 0.0785     | 208      | 0.0057 | 0.0040   | 0.0789     | 59   | 0.0046 | 0.0031   | 0.0833     |
| <b>Mesoamerican</b>             |            |        |          |            |          |        |          |            |      |        |          |            |
| Wild                            | 1749       | 0.0060 | 0.0040   | 0.0852     | 182      | 0.0061 | 0.0041   | 0.0836     | 53   | 0.0049 | 0.0032   | 0.0771     |
| All landraces                   | 1900       | 0.0050 | 0.0037   | 0.0382     | 198      | 0.0050 | 0.0037   | 0.0364     | 56   | 0.0039 | 0.0028   | 0.0249     |
| Mexican landraces               | 1852       | 0.0049 | 0.0039   | 0.0418     | 193      | 0.0050 | 0.0039   | 0.0397     | 55   | 0.0038 | 0.0030   | 0.0316     |
| Mexican sub population 1        | 1192       | 0.0035 | 0.0029   | 0.0283     | 124      | 0.0035 | 0.0029   | 0.0255     | 35   | 0.0028 | 0.0022   | 0.0205     |
| Mexican sub population 2        | 1149       | 0.0044 | 0.0039   | 0.0281     | 120      | 0.0044 | 0.0039   | 0.0260     | 36   | 0.0036 | 0.0032   | 0.0208     |
| Mexican sub population 3        | 991        | 0.0027 | 0.0024   | 0.0133     | 103      | 0.0027 | 0.0024   | 0.0104     | 30   | 0.0021 | 0.0019   | 0.0030     |
| Central American sub population | 1378       | 0.0047 | 0.0037   | 0.0459     | 143      | 0.0047 | 0.0037   | 0.0435     | 42   | 0.0037 | 0.0029   | 0.0348     |
| <b>Andean</b>                   |            |        |          |            |          |        |          |            |      |        |          |            |
| Wild                            | 555        | 0.0014 | 0.0013   | 0.0067     | 58       | 0.0014 | 0.0013   | 0.0056     | 16   | 0.0010 | 0.0010   | -0.0003    |
| All landraces                   | 618        | 0.0017 | 0.0015   | -0.0484    | 64       | 0.0017 | 0.0015   | -0.0471    | 20   | 0.0015 | 0.0013   | -0.1132    |
| Andean sub population 1         | 273        | 0.0011 | 0.0009   | 0.0203     | 29       | 0.0011 | 0.0009   | 0.0195     | 8    | 0.0009 | 0.0007   | 0.0222     |
| Andean sub population 2         | 507        | 0.0016 | 0.0013   | 0.0171     | 53       | 0.0028 | 0.0014   | 0.0136     | 16   | 0.0014 | 0.0012   | 0.0163     |

**Supplementary Table 15.** Window or gene based summary of population genomics statistics for common bean averaged over two window sizes and individual genes.



**Supplementary Table 16.** Mesoamerican domestication candidates (see separate Excel file)  
**Supplementary Table 17.** Andean domestication candidates (see separate Excel file)

| <b>Comparison</b>                | <b>Upper 90% <math>\pi_{\text{wild}}/\pi_{\text{landrace}}</math></b> | <b>Upper 90% <math>F_{ST}</math></b> |
|----------------------------------|-----------------------------------------------------------------------|--------------------------------------|
| <b>10kb/2kb sliding window</b>   |                                                                       |                                      |
| Mesoamerica wild vs. landrace    |                                                                       |                                      |
| Mesoamerica                      | 2.5596                                                                | 0.3806                               |
| Andean wild vs. Andean landraces | 2.7214                                                                | 0.3304                               |
| <b>Genes</b>                     |                                                                       |                                      |
| Mesoamerica wild vs. landrace    |                                                                       |                                      |
| Mesoamerica                      | 4.0510                                                                | 0.4613                               |
| Andean wild vs. Andean landraces | 2.9512                                                                | 0.3103                               |

**Supplementary Table 18.** Pi-ratio and Fst cutoff values to identify selection.

| Gene Model       | Seed weight symbol | Chrom | Start      | End        |
|------------------|--------------------|-------|------------|------------|
| Phvul.001G000500 | CDLB1              | Chr01 | 144,309    | 146,169    |
| Phvul.001G003700 | EXPO10             | Chr01 | 341,806    | 344,139    |
| Phvul.001G007800 | LOG1               | Chr01 | 616,683    | 620,819    |
| Phvul.001G017100 | DA1                | Chr01 | 1,429,648  | 1,435,650  |
| Phvul.001G032200 | KNAT1              | Chr01 | 3,078,925  | 3,084,634  |
| Phvul.001G037400 | LOG1               | Chr01 | 3,601,073  | 3,604,290  |
| Phvul.001G038800 | CKX7               | Chr01 | 3,860,546  | 3,865,008  |
| Phvul.001G043600 | AHK5               | Chr01 | 4,529,713  | 4,537,672  |
| Phvul.001G066000 | GA20OX1            | Chr01 | 8,381,806  | 8,385,990  |
| Phvul.001G125800 | ARR9_ATRR3         | Chr01 | 35,340,847 | 35,342,926 |
| Phvul.001G128800 | CKX1_CKX5_CKX6     | Chr01 | 36,632,356 | 36,635,291 |
| Phvul.001G149400 | IPT3_IPT5          | Chr01 | 40,282,825 | 40,283,742 |
| Phvul.001G166700 | ARR24              | Chr01 | 42,826,352 | 42,827,545 |
| Phvul.001G168500 | ARR24              | Chr01 | 43,093,331 | 43,094,123 |
| Phvul.001G177400 | LOG1               | Chr01 | 44,084,869 | 44,089,144 |
| Phvul.001G181600 | EXPO10             | Chr01 | 44,623,426 | 44,625,593 |
| Phvul.001G194400 | LOG1               | Chr01 | 46,037,896 | 46,042,703 |
| Phvul.001G204900 | WEE1               | Chr01 | 46,982,597 | 46,985,854 |
| Phvul.001G219700 | EXPO10             | Chr01 | 48,217,860 | 48,218,892 |
| Phvul.001G232600 | EXPO10             | Chr01 | 49,338,402 | 49,339,807 |
| Phvul.001G261500 | KLU                | Chr01 | 51,618,070 | 51,619,993 |
| Phvul.002G007600 | CLV1               | Chr02 | 878,645    | 882,943    |
| Phvul.002G024900 | DA1                | Chr02 | 2,660,954  | 2,668,059  |
| Phvul.002G029500 | DDM1               | Chr02 | 3,063,228  | 3,069,240  |
| Phvul.002G029700 | DWF4               | Chr02 | 3,098,498  | 3,103,000  |
| Phvul.002G083600 | EXPO10             | Chr02 | 12,900,620 | 12,902,739 |
| Phvul.002G090900 | EIF-5A             | Chr02 | 15,370,102 | 15,371,825 |
| Phvul.002G107100 | ATHK1              | Chr02 | 21,585,247 | 21,592,897 |
| Phvul.002G152900 | EXPO10             | Chr02 | 29,369,190 | 29,370,828 |
| Phvul.002G169600 | SH/SHB1            | Chr02 | 31,271,901 | 31,279,943 |
| Phvul.002G169700 | SH/SHB1            | Chr02 | 31,290,312 | 31,295,950 |
| Phvul.002G173000 | AHK2_AHK3_AHK4     | Chr02 | 32,130,970 | 32,138,797 |
| Phvul.002G191500 | MSI1               | Chr02 | 34,804,672 | 34,807,990 |
| Phvul.002G202100 | CDLB1              | Chr02 | 36,183,223 | 36,191,730 |
| Phvul.002G246800 | REV                | Chr02 | 41,323,900 | 41,330,159 |
| Phvul.002G282200 | ARF2               | Chr02 | 44,603,605 | 44,608,648 |
| Phvul.002G285000 | HSD1               | Chr02 | 44,850,979 | 44,853,798 |
| Phvul.002G324900 | AHK2_AHK3_AHK4     | Chr02 | 48,341,049 | 48,349,166 |
| Phvul.003G015500 | AHK2_AHK3_AHK4     | Chr03 | 1,411,225  | 1,417,895  |
| Phvul.003G041200 | KLU_EOD3           | Chr03 | 4,582,905  | 4,584,971  |
| Phvul.003G093100 | IPT3_IPT5_IPT7     | Chr03 | 19,179,812 | 19,181,667 |
| Phvul.003G099000 | AHP1_AHP3_AHP5     | Chr03 | 24,084,486 | 24,086,087 |
| Phvul.003G110100 | ARR1_ARR2          | Chr03 | 27,714,817 | 27,718,947 |
| Phvul.003G136400 | CKX2_CKX3_CKX5     | Chr03 | 32,803,946 | 32,807,861 |
| Phvul.003G136500 | CKX3               | Chr03 | 32,819,603 | 32,824,801 |
| Phvul.003G171500 | AVP                | Chr03 | 38,248,747 | 38,253,381 |

|                  |                              |       |            |            |
|------------------|------------------------------|-------|------------|------------|
| Phvul.003G183100 | KLU_EOD3                     | Chr03 | 39,501,091 | 39,503,000 |
| Phvul.003G187500 | EIF-5A                       | Chr03 | 39,959,123 | 39,960,634 |
| Phvul.003G196300 | ARR3                         | Chr03 | 40,904,491 | 40,906,528 |
| Phvul.003G196500 | ARR3_ARR15                   | Chr03 | 40,921,022 | 40,923,192 |
| Phvul.003G196600 | DEL1                         | Chr03 | 40,933,175 | 40,936,648 |
| Phvul.003G213800 | EXPO10                       | Chr03 | 42,940,817 | 42,942,083 |
| Phvul.003G253100 | DWF4                         | Chr03 | 48,110,623 | 48,114,757 |
| Phvul.003G264600 | ATHK1                        | Chr03 | 49,180,437 | 49,187,253 |
| Phvul.004G028800 | GASA4                        | Chr04 | 3,121,597  | 3,124,051  |
| Phvul.004G030500 | EXPO10                       | Chr04 | 3,354,742  | 3,356,837  |
| Phvul.004G064600 | CYP735A1_CYP735A2            | Chr04 | 8,973,882  | 8,980,231  |
| Phvul.004G123600 | GA20OX1                      | Chr04 | 39,699,554 | 39,701,390 |
| Phvul.004G126100 | ERL1_ERL2                    | Chr04 | 40,138,267 | 40,146,076 |
| Phvul.004G133200 | MET1                         | Chr04 | 41,050,065 | 41,057,146 |
| Phvul.005G022700 | LOG1                         | Chr05 | 2,008,896  | 2,010,207  |
| Phvul.005G027100 | ARR9_ATRR3                   | Chr05 | 2,488,729  | 2,490,502  |
| Phvul.005G034000 | CKX1_CKX5_CKX6               | Chr05 | 3,178,703  | 3,181,535  |
| Phvul.005G055400 | NAC1                         | Chr05 | 7,254,487  | 7,258,898  |
| Phvul.005G091500 | FIE/FIS3                     | Chr05 | 26,314,512 | 26,318,717 |
| Phvul.005G109300 | ENT3_ENT4_ENT6_ENT7          | Chr05 | 31,905,455 | 31,909,909 |
| Phvul.005G134000 | LOG1                         | Chr05 | 36,088,586 | 36,092,426 |
| Phvul.005G144500 | EXPO10                       | Chr05 | 37,308,017 | 37,309,279 |
| Phvul.005G166900 | REV                          | Chr05 | 39,178,449 | 39,185,837 |
| Phvul.005G178200 | AHP6                         | Chr05 | 40,070,379 | 40,071,717 |
| Phvul.006G029000 | CLV1                         | Chr06 | 12,372,351 | 12,376,922 |
| Phvul.006G077200 | EXPO10                       | Chr06 | 19,594,514 | 19,596,982 |
| Phvul.006G086800 | EXPO10                       | Chr06 | 20,544,891 | 20,546,039 |
| Phvul.006G103700 | AN3                          | Chr06 | 22,003,259 | 22,007,707 |
| Phvul.006G122800 | CDLB1                        | Chr06 | 23,818,584 | 23,826,499 |
| Phvul.006G128600 | REV                          | Chr06 | 24,311,622 | 24,317,626 |
| Phvul.006G154200 | IPT5_IPT7                    | Chr06 | 26,718,306 | 26,720,084 |
| Phvul.006G159300 | AHP1_AHP2_AHP3_AHP5<br>-AHP6 | Chr06 | 27,127,859 | 27,133,631 |
| Phvul.006G193100 | ENT3_ENT4_ENT6_ENT7          | Chr06 | 30,034,563 | 30,042,648 |
| Phvul.006G193300 | ENT3_ENT4_ENT6_ENT7          | Chr06 | 30,060,498 | 30,062,676 |
| Phvul.006G193400 | ENT3_ENT4_ENT6_ENT7          | Chr06 | 30,064,924 | 30,067,226 |
| Phvul.007G028100 | IPT1_IPT6_IPT8               | Chr07 | 2,165,646  | 2,167,688  |
| Phvul.007G064800 | GA20OX1                      | Chr07 | 5,714,864  | 5,716,900  |
| Phvul.007G148800 | LOG1                         | Chr07 | 36,706,872 | 36,710,937 |
| Phvul.007G166700 | FIE/FIS3                     | Chr07 | 39,848,075 | 39,854,258 |
| Phvul.007G167900 | AHP1_AHP2_AHP3_AHP5          | Chr07 | 40,027,937 | 40,032,078 |
| Phvul.007G170100 | IPT3_IPT5                    | Chr07 | 40,285,383 | 40,286,351 |
| Phvul.007G183200 | AHP1_AHP2_AHP3_AHP5          | Chr07 | 41,941,397 | 41,943,008 |
| Phvul.007G189200 | AN3                          | Chr07 | 42,549,946 | 42,553,336 |
| Phvul.007G207600 | EXPO10                       | Chr07 | 44,644,205 | 44,645,485 |
| Phvul.007G269400 | LOG1                         | Chr07 | 50,766,672 | 50,770,415 |
| Phvul.007G269500 | E2F3                         | Chr07 | 50,780,968 | 50,785,786 |
| Phvul.008G005600 | CYP735A1_CYP735A2            | Chr08 | 615,053    | 619,432    |
| Phvul.008G034700 | EXPO10                       | Chr08 | 2,903,260  | 2,905,172  |

|                  |                                        |       |            |            |
|------------------|----------------------------------------|-------|------------|------------|
| Phvul.008G037500 | EXPO10                                 | Chr08 | 3,131,412  | 3,133,124  |
| Phvul.008G038300 | SH/SHB1                                | Chr08 | 3,234,893  | 3,240,176  |
| Phvul.008G041200 | GASA4                                  | Chr08 | 3,480,877  | 3,482,421  |
| Phvul.008G120700 | EXPO10                                 | Chr08 | 15,661,050 | 15,664,385 |
| Phvul.008G160500 | ATTR3                                  | Chr08 | 41,207,395 | 41,211,052 |
| Phvul.008G229800 | DA1                                    | Chr08 | 54,461,684 | 54,466,341 |
| Phvul.008G232200 | EXPO10                                 | Chr08 | 54,674,682 | 54,676,674 |
| Phvul.008G240800 | EXPO10                                 | Chr08 | 55,529,938 | 55,532,235 |
| Phvul.008G248000 | EXPO10                                 | Chr08 | 56,264,486 | 56,266,809 |
| Phvul.008G253500 | CDLB1                                  | Chr08 | 56,750,663 | 56,754,010 |
| Phvul.008G285800 | AHK2                                   | Chr08 | 59,078,551 | 59,088,594 |
| Phvul.009G016000 | LOG1                                   | Chr09 | 2,660,091  | 2,663,107  |
| Phvul.009G019000 | EXPO10                                 | Chr09 | 3,497,612  | 3,499,649  |
| Phvul.009G034400 | PUP1_PUP2                              | Chr09 | 7,386,248  | 7,387,735  |
| Phvul.009G043400 | ARR5_ARR16_ARR17<br>CKX1_CKX3_CKX5_CKX | Chr09 | 8,461,349  | 8,462,913  |
| Phvul.009G060200 | 6                                      | Chr09 | 10,719,497 | 10,726,239 |
| Phvul.009G078800 | LOG1                                   | Chr09 | 12,794,282 | 12,797,245 |
| Phvul.009G081800 | CKX7                                   | Chr09 | 13,074,754 | 13,078,870 |
| Phvul.009G109700 | MAX4                                   | Chr09 | 16,502,002 | 16,504,992 |
| Phvul.009G110500 | REV                                    | Chr09 | 16,589,773 | 16,595,618 |
| Phvul.009G131500 | GA20OX1                                | Chr09 | 19,423,003 | 19,426,332 |
| Phvul.009G138500 | BRI1/DWF2_BRI1_EMS1_                   | Chr09 | 20,367,117 | 20,370,855 |
| Phvul.009G142800 | EXPO10                                 | Chr09 | 20,892,482 | 20,894,300 |
| Phvul.009G155400 | GA20OX1                                | Chr09 | 22,617,152 | 22,620,144 |
| Phvul.009G161900 | ARF2                                   | Chr09 | 23,557,877 | 23,563,227 |
| Phvul.009G182500 | DEL1                                   | Chr09 | 26,885,942 | 26,892,635 |
| Phvul.009G182800 | ARR7                                   | Chr09 | 26,960,006 | 26,962,365 |
| Phvul.009G184600 | EIF-5A                                 | Chr09 | 27,211,707 | 27,214,154 |
| Phvul.009G186400 | EXPO10                                 | Chr09 | 27,567,879 | 27,570,714 |
| Phvul.009G187400 | GASA4                                  | Chr09 | 27,698,675 | 27,700,213 |
| Phvul.009G231700 | CKX3_CKX5                              | Chr09 | 34,182,344 | 34,186,263 |
| Phvul.009G231800 | CKX3                                   | Chr09 | 34,223,306 | 34,229,917 |
| Phvul.009G253200 | ARR1_ARR2                              | Chr09 | 36,593,953 | 36,598,004 |
| Phvul.010G010200 | EXPO10                                 | Chr10 | 1,596,184  | 1,599,156  |
| Phvul.010G087500 | GA20OX1                                | Chr10 | 32,648,913 | 32,651,094 |
| Phvul.010G117100 | KLU_EOD3                               | Chr10 | 38,413,620 | 38,415,853 |
| Phvul.010G146200 | REV                                    | Chr10 | 41,737,278 | 41,745,149 |
| Phvul.011G013500 | ENT1                                   | Chr11 | 1,029,308  | 1,031,750  |
| Phvul.011G014000 | CKX1_CKX5_CKX6                         | Chr11 | 1,092,381  | 1,094,971  |
| Phvul.011G031700 | DWF1                                   | Chr11 | 2,752,538  | 2,755,643  |
| Phvul.011G035800 | MSI1                                   | Chr11 | 3,137,684  | 3,140,779  |
| Phvul.011G063800 | EXPO10                                 | Chr11 | 5,535,300  | 5,537,331  |
| Phvul.011G079800 | REV                                    | Chr11 | 7,419,065  | 7,425,525  |
| Phvul.011G080600 | LOG1                                   | Chr11 | 7,544,162  | 7,548,685  |
| Phvul.011G097700 | E2F3                                   | Chr11 | 10,137,208 | 10,143,109 |
| Phvul.011G110200 | ENT3_ENT4_ENT6_ENT7                    | Chr11 | 14,190,043 | 14,193,584 |

**Supplementary Table 19.** Candidate common bean seed weight genes.

|                   |              |              |            |                 |                                                                               |                                                                                           | <i>Arabidopsis thaliana</i>   |  |
|-------------------|--------------|--------------|------------|-----------------|-------------------------------------------------------------------------------|-------------------------------------------------------------------------------------------|-------------------------------|--|
| <b>Gene model</b> | <b>Chrom</b> | <b>Start</b> | <b>End</b> | <b>best hit</b> | <b>gene symbol</b>                                                            | <b>gene description</b>                                                                   | <b>Distance GWAS SNP peak</b> |  |
| Phvul.001G261500  | 1            | 51,618,070   | 51,619,993 | AT1G13710       | CYP78A5,<br>KLU                                                               | cytochrome P450,<br>family 78,<br>subfamily A,<br>polypeptide 5                           | 5,223                         |  |
| Phvul.003G099000  | 3            | 24,084,486   | 24,086,087 | AT3G21510       | AHP1                                                                          | NAC (No Apical<br>Meristem) domain<br>transcriptional<br>regulator<br>superfamily protein | 42,841                        |  |
| Phvul.003G196500  | 3            | 40,921,022   | 40,923,192 | AT1G74890       | ARR5,<br>ATRR2,<br>IBC6, RR5                                                  | response regulator<br>5                                                                   | 427                           |  |
| Phvul.003G196600  | 3            | 40,933,175   | 40,936,648 | AT3G48160       | DEL1,<br>E2L3,<br>E2FE<br>DWF4,<br>CYP90B1,<br>CLM,<br>SNP2,<br>SAV1,<br>PSC1 | DP-E2F-like 1                                                                             | 0                             |  |
| Phvul.003G253100  | 3            | 48,110,623   | 48,114,757 | AT3G50660       | ATHK1,<br>AHK1,                                                               | Cytochrome P450<br>superfamily protein                                                    | 79,755                        |  |
| Phvul.003G264600  | 3            | 49,180,437   | 49,187,253 | AT2G17820       | HK1                                                                           | histidine kinase 1                                                                        | 31,991                        |  |
| Phvul.004G064600  | 4            | 8,973,882    | 8,980,231  | AT5G38450       | CYP735A1<br>ATEXPA8,<br>EXP8,<br>ATEXP8,<br>ATHEXP<br>ALPHA<br>1.11,<br>EXPA8 | cytochrome P450,<br>family 735,<br>subfamily A,<br>polypeptide 1                          | 32,221                        |  |
| Phvul.006G077200  | 6            | 19,594,514   | 19,596,982 | AT2G40610       | EXPA8                                                                         | 0<br>histidine-<br>containing<br>phosphotransmitter<br>1                                  | 16,867                        |  |
| Phvul.006G159300  | 7            | 27,127,859   | 27,133,631 | AT3G21510       | AHP1                                                                          | Transducin/WD40<br>repeat-like<br>superfamily protein                                     | 67,893                        |  |
| Phvul.007G166700  | 7            | 39,848,075   | 39,854,258 | AT3G20740       | FIE, FIS3,<br>FIE1<br>ATEXPA4,<br>ATEXP4,<br>ATHEXP<br>ALPHA<br>1.6,<br>EXPA4 | expansin A4                                                                               | 57,051                        |  |
| Phvul.008G120700  | 8            | 15,661,050   | 15,664,385 | AT2G37640       | ATEXPA4,<br>ATEXP4,<br>ATHEXP<br>ALPHA<br>1.6,<br>EXPA4                       | expansin A4                                                                               | 44,202                        |  |
| Phvul.010G010200  | 10           | 1,596,184    | 1,599,156  | AT2G39700       | EXPA4                                                                         | expansin A4                                                                               | 17,454                        |  |

|                  |    |           |           |           |                                   |                                                                  |        |
|------------------|----|-----------|-----------|-----------|-----------------------------------|------------------------------------------------------------------|--------|
| Phvul.011G013500 | 11 | 1,029,308 | 1,031,750 | AT1G70330 | ENT1,AT,<br>ENT1                  | WPP domain<br>protein 2                                          | 1,212  |
| Phvul.011G014000 | 11 | 1,092,381 | 1,094,971 | AT3G63440 | ATCKX6,<br>CKX6,<br>ATCKX7        | sulfur E2                                                        | 59,412 |
| Phvul.011G035800 | 11 | 3,137,684 | 3,140,779 | AT2G16780 | MSI2,<br>MSI02,<br>NFC02,<br>NFC2 | Transducin family<br>protein / WD-40<br>repeat family<br>protein | 0      |

**Supplementary Table 20.** Mesoamerican seed weight improvement candidate genes.

| Gene model     | Chrom | Gene start | Gene end   | MA selected gene block assignment | Best <i>A. thaliana</i> hit | Top <i>A. thaliana</i> hit symbol | Top <i>A. thaliana</i> hit description                                                              | Distance to SNP |
|----------------|-------|------------|------------|-----------------------------------|-----------------------------|-----------------------------------|-----------------------------------------------------------------------------------------------------|-----------------|
| Phvu001G258300 | 1     | 51,408,257 | 51,411,015 | 95                                | AT1G67700                   |                                   | unknown protein                                                                                     | 9,590           |
| Phvu001G258400 | 1     | 51,413,288 | 51,418,655 | 95                                | AT3G26020                   |                                   | Protein phosphatase 2A regulatory B subunit family protein                                          | 14,621          |
| Phvu001G260800 | 1     | 51,580,507 | 51,583,778 | None                              | AT1G67440                   | emb1688                           | basic helix-loop-helix (bHLH) DNA-binding superfamily protein                                       | 34,430          |
| Phvu002G193900 | 2     | 35,052,110 | 35,052,559 | None                              |                             |                                   |                                                                                                     | 9,021           |
| Phvu003G035600 | 3     | 3,571,816  | 3,577,791  | 238                               | AT1G13380                   |                                   | Protein of unknown function (DUF1218)                                                               | 33,863          |
| Phvu003G050900 | 3     | 6,241,388  | 6,253,146  | 245                               | AT2G04160                   | AIR3                              | Subtilisin-like serine endopeptidase family protein                                                 | 0               |
| Phvu003G104100 | 3     | 25,801,140 | 25,806,833 | 267                               | AT1G09040                   |                                   | non-ATPase subunit 9                                                                                | 21,790          |
| Phvu003G124100 | 3     | 30,403,201 | 30,405,704 | 269                               | AT5G28050                   |                                   | Cytidine/deoxycytidylate deaminase family protein                                                   | 21,166          |
| Phvu003G124900 | 3     | 30,542,597 | 30,550,021 | 270                               | AT5G17250                   |                                   | Alkaline-phosphatase-like family protein                                                            | 2,573           |
| Phvu003G144500 | 3     | 34,150,168 | 34,153,951 | 275                               | AT5G57390                   | AHL5, CHO1, EMK                   | AINTEGUMENTA-like 5                                                                                 | 42,105          |
| Phvu003G196800 | 3     | 40,951,232 | 40,951,474 | 293                               | AT3G48180                   |                                   | Plant protein of unknown function (DUF869)                                                          | 9,239           |
| Phvu003G264600 | 3     | 49,180,437 | 49,187,253 | 323                               | AT2G17820                   | ATHK1, AHK1, HK1                  | histidine kinase 1                                                                                  | 31,930          |
| Phvu003G264700 | 3     | 49,189,215 | 49,192,451 | 323                               | AT5G66140                   | PAD2                              | vacuolar ATP synthase subunit C (VATC) / V-ATPase C subunit / vacuolar proton pump C subunit (DET3) | 35,363          |
| Phvu003G265400 | 3     | 49,227,814 | 49,229,673 | 323                               | AT5G04780                   |                                   | Pentatricopeptide repeat (PPR) superfamily protein                                                  | 8,570           |
| Phvu004G057500 | 4     | 7,657,458  | 7,661,986  | 347                               | AT3G27320                   |                                   | alpha/beta-Hydrolases superfamily protein                                                           | 35,580          |
| Phvu004G066500 | 4     | 9,460,848  | 9,462,568  | None                              | AT5G33370                   |                                   | GDSL-like Lipase/Acylhydrolase superfamily protein                                                  | 30,307          |
| Phvu006G070000 | 6     | 18,939,698 | 18,940,811 | 496                               | AT5G58580                   | ATL2, TL2                         | TOXICOS EN LEVADURA 2                                                                               | 13,650          |
| Phvu006G070100 | 6     | 18,945,216 | 18,945,869 | 496                               | AT3G05200                   |                                   |                                                                                                     | 8,592           |
| Phvu007G065600 | 7     | 5,847,170  | 5,851,242  | 538                               | AT5G62165                   | AGL42                             | AGAMOUS-like 42                                                                                     | 19,861          |
| Phvu007G065800 | 7     | 5,858,793  | 5,860,428  | 538                               | AT5G18990                   |                                   | Peroxidase superfamily protein                                                                      | 10,675          |
| Phvu007G066000 | 7     | 5,869,640  | 5,872,158  | 538                               | AT4G38010                   |                                   | Pentatricopeptide repeat (PPR-like) superfamily protein                                             | 0               |
| Phvu007G066800 | 7     | 5,976,854  | 5,979,050  | None                              | AT5G51940                   | NRFB6A, NRFB6A, NRFB6A            | RNA polymerase Rpb6                                                                                 | 15,141          |
| Phvu007G066900 | 7     | 5,993,698  | 5,997,594  | None                              | AT2G45750                   |                                   | S-adenosyl-L-methionine-dependent methyltransferases superfamily protein                            | 31,985          |
| Phvu007G071100 | 7     | 6,408,764  | 6,409,930  | None                              | AT5G52390                   |                                   | unknown protein                                                                                     | 36,657          |
| Phvu007G075800 | 7     | 6,962,320  | 6,964,291  | 542                               | AT5G52870                   |                                   | unknown protein                                                                                     | 13,076          |
| Phvu007G075900 | 7     | 6,978,392  | 6,980,784  | 542                               | AT4G23630                   |                                   | Reticulon family protein                                                                            | 12,355          |
| Phvu007G076300 | 7     | 7,016,455  | 7,024,238  | 542                               | AT4G28000                   |                                   | P-loop containing nucleoside triphosphate hydrolases superfamily protein                            | 0               |
| Phvu007G094000 | 7     | 9,664,594  | 9,665,620  | 546                               |                             |                                   |                                                                                                     | 41,860          |
| Phvu007G094200 | 7     | 9,696,188  | 9,705,030  | 546                               | AT1G48850                   | EMB1144                           | chorismate synthase, putative / 5-enolpyruvylshikimate-3-phosphate phospholylase, putative          | 46,778          |
| Phvu007G094300 | 7     | 9,724,193  | 9,729,678  | 546                               | AT2G39220                   | PLP6, PLA IIB                     | PATATIN-like protein 6                                                                              | 22,130          |
| Phvu007G094400 | 7     | 9,770,994  | 9,772,378  | 546                               | AT5G19290                   |                                   | alpha/beta-Hydrolases superfamily protein                                                           | 19,186          |
| Phvu007G095000 | 7     | 9,869,289  | 9,872,915  | 546                               | AT4G30080                   | ARF16                             | auxin response factor 16                                                                            | 29,711          |
| Phvu007G095100 | 7     | 9,882,588  | 9,884,606  | 546                               | ATMG00300                   |                                   |                                                                                                     | 18,020          |
| Phvu007G095300 | 7     | 9,922,891  | 9,926,868  | 546                               | AT3G54810                   | GATA9                             | GATA transcription factor 9                                                                         | 20,265          |
| Phvu007G095600 | 7     | 9,983,235  | 9,985,678  | 546                               | AT5G03250                   |                                   | Phototropic-responsive NPH3 family protein                                                          | 39,122          |
| Phvu007G095700 | 7     | 9,987,742  | 9,988,152  | 546                               | AT4G02210                   |                                   |                                                                                                     | 36,648          |
| Phvu007G095800 | 7     | 9,992,495  | 9,994,474  | 546                               |                             |                                   |                                                                                                     | 30,326          |
| Phvu007G095900 | 7     | 9,996,844  | 9,998,891  | 546                               | AT4G14145                   |                                   | unknown protein                                                                                     | 25,909          |
| Phvu007G097100 | 7     | 10,248,037 | 10,254,281 | 546                               | AT3G10360                   | APUM2, PUM2                       |                                                                                                     | 34,621          |
| Phvu007G097200 | 7     | 10,278,772 | 10,289,556 | 546                               | AT2G39130                   |                                   | Transmembrane amino acid transporter family protein                                                 | 0               |
| Phvu007G097400 | 7     | 10,374,618 | 10,378,029 | 546                               |                             |                                   |                                                                                                     | 10,474          |
| Phvu007G097500 | 7     | 10,403,778 | 10,406,331 | 546                               | AT4G02550                   |                                   |                                                                                                     | 39,634          |
| Phvu007G098700 | 7     | 10,512,291 | 10,516,538 | 546                               | AT3G54850                   | ATPUB14, PUB14                    | plant U-box 14                                                                                      | 8,126           |
| Phvu007G098800 | 7     | 10,517,794 | 10,543,382 | 546                               | AT3G10380                   | SEC8, ATSEC8                      | subunit of exocyst complex 8                                                                        | 13,629          |
| Phvu007G098900 | 7     | 10,543,501 | 10,547,486 | 546                               | AT2G39140                   | SVR1                              | pseudouridine synthase family protein                                                               | 791             |
| Phvu007G099100 | 7     | 10,588,199 | 10,591,587 | 546                               | AT2G39170                   |                                   | Galactose oxidase/kelch repeat superfamily protein                                                  | 10,025          |
| Phvu007G099300 | 7     | 10,628,850 | 10,631,945 | 546                               | AT3G10405                   |                                   | unknown protein                                                                                     | 27,238          |
| Phvu007G099500 | 7     | 10,638,977 | 10,646,055 | 546                               | AT3G54880                   |                                   | unknown protein                                                                                     | 37,365          |
| Phvu007G100800 | 7     | 10,964,374 | 10,965,093 | None                              |                             |                                   |                                                                                                     | 15,225          |
| Phvu007G101400 | 7     | 11,174,527 | 11,175,292 | 550                               | AT1G68765                   |                                   |                                                                                                     | 29,497          |
| Phvu007G101600 | 7     | 11,247,272 | 11,249,964 | 550                               | AT3G25670                   |                                   | RNI-like superfamily protein                                                                        | 42,483          |
| Phvu007G107600 | 7     | 13,015,723 | 13,017,441 | None                              | AT5G03120                   |                                   |                                                                                                     | 14,372          |
| Phvu007G108100 | 7     | 13,277,836 | 13,278,510 | 556                               |                             |                                   | HR-like lesion-inducing protein-related                                                             | 4,704           |
| Phvu007G109200 | 7     | 13,591,085 | 13,594,278 | None                              | AT2G30580                   | DRIP2                             | DREB2A-interacting protein 2                                                                        | 25,940          |
| Phvu007G119600 | 7     | 19,539,118 | 19,541,066 | 575                               | AT2G02240                   | MEE66                             | Transducin family protein / WD-40 repeat family protein                                             | 37,574          |
| Phvu007G121500 | 7     | 21,620,803 | 21,622,206 | 580                               | AT1G08650                   | PPCK1, ATPCK1                     | cation/H+ exchanger 20                                                                              | 25,431          |
| Phvu007G123000 | 7     | 23,296,799 | 23,300,482 | None                              | AT1G54450                   |                                   |                                                                                                     | 44,015          |
| Phvu007G166700 | 7     | 39,848,075 | 39,854,258 | 595                               | AT3G20740                   | FIE, FIS3, FIE1                   | Transducin/WD40 repeat-like superfamily protein                                                     | 9,246           |
| Phvu007G166900 | 7     | 39,863,504 | 39,867,874 | 595                               | AT4G03110                   | ARBP-DR1, RBP-DR1                 | RNA-binding protein-defense related 1                                                               | 49,780          |
| Phvu007G171000 | 7     | 40,345,396 | 40,349,737 | None                              | AT1G61750                   |                                   |                                                                                                     | 46,340          |
| Phvu008G062800 | 8     | 5,704,198  | 5,704,599  | None                              | AT5G12060                   |                                   | Plant self-incompatibility protein S1 family                                                        | 2,234           |
| Phvu008G100300 | 8     | 10,901,891 | 10,903,411 | None                              | AT2G41475                   |                                   |                                                                                                     | 34,281          |
| Phvu008G113700 | 8     | 13,662,384 | 13,663,511 | None                              | AT3G09270                   | ATGSTU8, GSTU8                    | glutathione S-transferase TAU 8                                                                     | 39,152          |
| Phvu008G130300 | 8     | 20,089,563 | 20,091,716 | 660                               | AT1G65450                   |                                   | HXXXD-type acyl-transferase family protein                                                          | 16,963          |
| Phvu008G130500 | 8     | 20,108,398 | 20,113,506 | 660                               | AT5G48660                   |                                   | B-cell receptor-associated protein 31-like                                                          | 0               |
| Phvu008G130600 | 8     | 20,139,504 | 20,145,813 | 660                               | AT3G25070                   | RIN4                              | RPM1 interacting protein 4                                                                          | 30,825          |
| Phvu008G130700 | 8     | 20,149,301 | 20,151,400 | 660                               | AT3G25100                   | CDC45                             | cell division cycle 45                                                                              | 40,622          |
| Phvu008G141900 | 8     | 25,473,533 | 25,473,985 | 668                               |                             |                                   | Nucleic acid-binding, OB-fold-like protein                                                          | 43,018          |
| Phvu008G168000 | 8     | 43,530,648 | 43,537,164 | 675                               | AT1G77760                   | NI1A, GNR1, NR1                   | nitrate reductase 1                                                                                 | 0               |
| Phvu009G204800 | 9     | 30,290,454 | 30,293,780 | 798                               | AT5G10840                   |                                   | Endomembrane protein 70 protein family                                                              | 0               |
| Phvu009G223700 | 9     | 33,110,310 | 33,111,518 | 808                               | AT4G22600                   |                                   | ARM repeat superfamily protein                                                                      | 23,096          |
| Phvu009G234200 | 9     | 34,533,509 | 34,536,079 | 815                               | AT5G57090                   | PIN7, ATPIN7                      | Auxin efflux carrier family protein                                                                 | 46,220          |
| Phvu010G101800 | 10    | 35,914,907 | 35,916,655 | None                              | AT4G34138                   | UGT73B1                           | UDP-glucosyl transferase 73B1                                                                       | 0               |
| Phvu010G102300 | 10    | 35,938,015 | 35,938,383 | None                              | AT5G63470                   | NF-YC4                            | nuclear factor Y, subunit C4                                                                        | 22,480          |
| Phvu011G037000 | 11    | 3,224,391  | 3,224,860  | 878                               | AT4G38840                   |                                   | SAUR-like auxin-responsive protein family                                                           | 32,254          |

**Supplementary Table 21** Mesoamerican domestication candidates within 50kb of GWAS peak.



| Gene model      | Chrom | Start      | End        | A. thaliana best hit | A. thaliana gene symbol                         | A. thaliana gene description                                                  | Distance to GWAS SNP peak |
|-----------------|-------|------------|------------|----------------------|-------------------------------------------------|-------------------------------------------------------------------------------|---------------------------|
| PhvuL001G261500 | Chr01 | 51,618,070 | 51,619,993 | AT1G13710            | CYP78A5, KLU                                    | cytochrome P450, family 78, subfamily A, polypeptide 5                        | 5,223                     |
| PhvuL003G099000 | Chr03 | 24,084,486 | 24,086,087 | AT3G21510            | AHP1                                            | NAC (No Apical Meristem) domain transcriptional regulator superfamily protein | 42,841                    |
| PhvuL003G196500 | Chr03 | 40,921,022 | 40,923,192 | AT1G74890            | ARR5, ATRR2, IBC6, RRS                          | response regulator 5                                                          | 427                       |
| PhvuL003G196600 | Chr03 | 40,933,175 | 40,936,648 | AT3G48160            | DEL1, E2L3, E2FE                                | DP-E2F-like 1                                                                 | 0                         |
| PhvuL003G253100 | Chr03 | 48,110,623 | 48,114,757 | AT3G50660            | DWF4, CYP90B1, CLM, SNP2, SAV1, PSC1            | Cytochrome P450 superfamily protein                                           | 79,755                    |
| PhvuL003G264600 | Chr03 | 49,180,437 | 49,187,253 | AT2G17820            | ATHK1, AHK1, HK1                                | histidine kinase 1                                                            | 31,991                    |
| PhvuL004G064600 | Chr04 | 8,973,882  | 8,980,231  | AT5G38450            | CYP735A1                                        | cytochrome P450, family 735, subfamily A, polypeptide 1                       | 32,221                    |
| PhvuL006G077200 | Chr06 | 19,594,514 | 19,596,982 | AT2G40610            | ATEXPA8, EXP8, ATEXP8, ATHEXP ALPHA 1.11, EXPA8 | 0                                                                             | 16,867                    |
| PhvuL006G159300 | Chr07 | 27,127,859 | 27,133,631 | AT3G21510            | AHP1                                            | histidine-containing phosphotransmitter 1                                     | 67,893                    |
| PhvuL007G166700 | Chr07 | 39,848,075 | 39,854,258 | AT3G20740            | FIE, FIS3, FIE1                                 | Transducin/WD40 repeat-like superfamily protein                               | 57,051                    |
| PhvuL008G120700 | Chr08 | 15,661,050 | 15,664,385 | AT2G37640            | ATEXPA4, ATEXPA4, ATHEXP ALPHA 1.6, EXPA4       | expansin A4                                                                   | 44,202                    |
| PhvuL010G010200 | Chr10 | 1,596,184  | 1,599,156  | AT2G39700            | ATEXPA4, ATEXPA4, ATHEXP ALPHA 1.6, EXPA4       | expansin A4                                                                   | 17,454                    |
| PhvuL011G013500 | Chr11 | 1,029,308  | 1,031,750  | AT1G70330            | ENT1, AT, ENT1                                  | WPP domain protein 2                                                          | 1,212                     |
| PhvuL011G014000 | Chr11 | 1,092,381  | 1,094,971  | AT3G63440            | ATCKX6, CKX6, ATCKX7                            | sulfur E2                                                                     | 59,412                    |
| PhvuL011G035800 | Chr11 | 3,137,684  | 3,140,779  | AT2G16780            | MSI2, MSI02, NFC02, NFC2                        | Transducin family protein / WD-40 repeat family protein                       | 0                         |

**Supplementary Table 22. Mesoamerican seed weight improvement candidate genes.**

## **B. Supplementary Note**

### **Outline**

|                                                  | <b>Page</b> |
|--------------------------------------------------|-------------|
| <b>1 Sequencing, Assembly, and Annotation</b>    | <b>2</b>    |
| S1.1 Accession numbers                           |             |
| S1.2 Pseudomolecule Chromosome Construction      |             |
| S1.3 Screening and Final Assembly Release        |             |
| S1.4 Assessment of Assembly Accuracy             |             |
| <b>2 Centromere and Pericentromeric Analysis</b> | <b>15</b>   |
| <b>3 Repeat Annotation and Analysis</b>          | <b>18</b>   |
| <b>4 Resistance Gene Analysis</b>                | <b>24</b>   |
| <b>5 Comparison of Glycine and Phaseolus</b>     | <b>26</b>   |
| <b>6 Historical Population Size Analysis</b>     | <b>30</b>   |
| <b>7 Common Bean Domestication Analysis</b>      | <b>34</b>   |

## **1 Sequencing, Assembly, and Annotation**

### **1.1 Accession numbers**

Version 1.0 assembly - Assembly and annotation is available from <http://www.phytozome.net/commonbean.php> and is deposited in Genbank under accession ANNZ01000000.

454 Shotgun and Pairs: SRX012337-SRX012348, SRX028889-SRX028890, SRX028894-SRX028898, SRX028915-SRX028920, SRX028964-SRX028978, SRX062194-SRX062216, SRX273310-SRX273311

BAC END Sequence - PV\_A: EI415689-EI504705; PV\_B, PV\_C: JY504315-JY663793

Fosmid End Sequence – JY665079-JY879798, JY893769-JY972748.

Illumina Whole Genome Shotgun: SRX273308-SRX273309

### **1.2 Pseudomolecule Chromosome Construction**

The combination of the available genetic maps (7,015 SNP and 261 SSR markers for a total of 7,276) as well as 25 framework markers and *Glycine max* synteny were used to identify false joins in the initial assembly. Scaffolds were broken if they contained a putative false join coincident with an area of low BAC/fosmid coverage. A total of 71 breaks were identified and broken, resulting in 1,698 scaffolds in the broken assembly. The optimal order and orientation of the broken scaffolds was obtained using markers and *G. max* synteny. Due to the high-resolution of the genetic map (7,015 markers in the 267-individual primary mapping population) and the large size of the assembled scaffolds, the pseudomolecule assemblies were well constructed before use of synteny. Nevertheless, genetic map data alone was not able to give precise placements or orderings of scaffolds within the recombination-poor pericentromeric regions. Additional refinements to the 11 pseudomolecule chromosomes were made based on synteny with soybean (*Glycine max*). Approximately 22% (52/240) of the initial marker-based scaffold ordering was locally modified based on *G. max* synteny with (usually within a 1 cM range, within the pericentromeres); and 17% (41/240) of the orientations were changed. Almost all such order/orientations and synteny changes were made within the Phaseolus pericentromeric regions, where there is virtually no genetic recombination. Significant telomeric sequence was identified using the TTTAGGG repeat, and care was taken to make sure that it was properly oriented in the production assembly. BAC/Fosmid paired end link support was also used to order and orient the scaffolds composing the pseudomolecule chromosomes. A total of 248 joins were made on 259 scaffolds to form the final assembly containing 11 chromosomes capturing 514.8 Mb (98.8%) of the assembled sequence. Each join is sized with 10,000 Ns. After screening for contaminant, there were 697 additional scaffolds that did contain a marker alignment and could not be localized using *G. max* synteny, and they are included as part of the release assembly. The final assembly contains 708 scaffolds (41,391 contigs) with a contig L50 of 39.5 kb and a scaffold L50 of 50.4 Mb. Plots of the marker placements for the 11 chromosomes are shown in Supplementary Figs. 1-11.

### **1.3 Screening and Final Assembly Release**

Remaining scaffolds were classified into bins depending on sequence content. Contamination was identified using megablast against Genbank NR and blastp using a set

of known microbial proteins. Additional scaffolds were classified as mitochondrion (8 scaffolds, 18.1 Kb), chloroplast (12 scaffolds, 453.5 Kb), unanchored rDNA (6 scaffolds, 158.1 Kb), prokaryote (1 scaffold, 44.8 Kb), unanchored retrotransposons (28 scaffolds, 65.1 Kb), repetitive (>95% masked with 24mers that occur more than 4 times in the genome) (160 scaffolds, 1.4 Mb). We also removed 527 scaffolds that were less than 1 kb in sequence length (total of 390.4 Kb). Resulting final statistics are shown in Supplementary Table 3.

#### 1.4 Assessment of Assembly Accuracy

A set of 8 random BAC clones totaling 1.12 Mb were sequenced in order to assess the completeness of the genic regions. A low rate of base pair mismatch and indel bases (combined <0.5%) was indicated in the comparison of the 8 BAC clones and the assembly, with the main discrepancies in the clones being minor gaps (2-5 Kb). A representative example of one of these BAC clones is given in Supplementary Fig. 12 (all dot plots were generated using Gepard (Krumisiek and Rattei 2007)). The overall nonmatching bp rate (not including gap bases) in this group of clones is 0.13% (1,414 bp out of a possible 1.03 Mb). A second set of 5 BAC clones aligned to regions of moderate transposon content, with a representative clone given in Supplementary Fig. 13. The third set of BAC clones are ones that place in regions of high transposon content, with an example given in Supplementary Fig. 14. Finally, there are regions where the transposon/repeat content is a confounding factor in the genome assembly process, resulting in these regions not being included in the final assembly. An example of such a clone is given in Supplementary Figure 23. The clone was not located in the final assembly, likely due to the complex repetitive structures in the clone.

Completeness of the euchromatic portion of the genome assembly was assessed using 108,012 *P. vulgaris* EST sequences >400bp obtained from GenBank. The aim of this analysis is to obtain a measure of completeness of the assembly, rather than a comprehensive examination of gene space. ESTs were aligned to the release assembly using BLAT (Parameters: -t=dna -q=rna -extendThroughN). Alignments that comprised  $\geq 90\%$  base pair identity and  $\geq 85\%$  EST coverage were retained. The screened alignments indicate that 102,254 of 108,012 (96.9%) of the ESTs aligned to the assembly. A further 2,146 (2.03%) could be placed at >50% EST coverage, totaling 98.93%. Comparatively few sequences represented artifacts (2,479;2.3%) or were not found (1,133;1.07%). We also aligned 11 rnaSEQ libraries composed of 2x100 bp Illumina reads given in Supplementary Table 4. Reads were aligned using GSNAP (Wu and Nacu,2010) with paramters “-A sam -N 1 -n 6 -w 5000 --nthreads=1 --novelend-splicedist=5000 -K 18 -l 18 --pairmax-rna=5400 --max-mismatches=0.04” as part of the annotation process with an average of 93.2% aligned to the genome sequence (Supplementary Table 4).

## 2 Centromere and Pericentromeric Analysis

Centromeric positions were identified by BLASTN using centromere tandem repeats CentPv1 and CentPv2 with at least 80% length similarity and 60% identity. For almost all chromosomes CentPv1 was used except for Pv05, Pv06 and Pv11 where CentPv2 was used (Iwata et al. 2013).

To determine the proportion of the genome that falls within pericentromeric

regions, we compared gene and repeat density and genetic distance versus the physical distance (Supplementary Fig. 16). Genetic distance was measured using 6945 SNP and SSR markers on the assembly, in the Stampede x Redhawk F2 population genetic map with 267 individuals. Repeats density was parsed using Repeatmasker (version 3.3.0; <http://www.repeatmasker.org/>) with non-default parameters based on a TE custom library constructed for Phaseolus which include 791 repeats composed by 285 Class I elements, 460 Class II elements and 46 unclassified elements in the database ([www.phytozome.org](http://www.phytozome.org)). All measures were taken per 1-Mb sliding window at 200-kb intervals; gene counts were taken for gene density, nucleotide counts for repeats density and average of cM between markers in a window were taken for genetic distance. The start and end points on the pericentromeric regions were taken according the cross points in the plots where gene density decreased, repeats density increased and the recombination rate is suppressed or diminished.

### **3 Repeat Annotation and Analysis**

Transposons are the most abundant genetic elements which have broad impacts on genome evolution, gene innovation and regulation, as well as on maintenance of chromosome structure and genomic heterochromatic silencing (Lippman and Martienssen 2004). In addition, transposons also serve as useful tools for insertional mutagenesis and gene isolation (Kumar and Bennetzen 1999; IRGSP 2005). Thus, genome-wide transposon annotation is important for understanding the genome composition and dynamics and the initial step for discovering endogenous active transposons in common bean.

The common bean genome harbors ~45.0% of transposons, which include 39.4% of retrotransposons (Class 1) and 5.5% of DNA transposons (Class 2) (Supplementary Table 8). The Ty3-gypsy retrotransposons are the most plentiful elements which make up about 25.1% of the genome or more than 50% of the total transposons. Ty1-copia retrotransposons account for about 9.4% of the common bean genome. In addition, some LTR retroelements cannot be grouped as their internal regions encode no retrotransposase or only produce tiny proteins, these elements constitute 2.0% of the genome. Long interspersed elements (LINEs) and short interspersed elements (SINEs) comprise 2.9% and 0.03% of the common bean genome. DNA elements are much lower than retroelements in number and fraction, they contribute 5.5% of the common bean genome. Among DNA transposons, the CACTA elements are the most abundant superfamily, these elements constitute 2.7% of the genome. In addition, four superfamilies of DNA elements also were identified which include Harbinger/PIF, hAT, Helitron and MULE. The transposon contents on 11 chromosomes in common bean are different, the chromosomes 10 exhibits the highest transposon content (55.1%) whereas the chromosome 9 has the lowest fraction of transposons (26.8%) which is less than half of chromosome 10 (Supplementary Table 9). The proportions of DNA transposons on 11 chromosomes are similar which range from 5.0% on chromosomes 2 and 7 to 6.1% on chromosome 4. However, the retrotransposon contents greatly vary from 20.8% on chromosome 9 to 48.7% on chromosome 10 and suggesting that the difference of transposon fractions on 11 chromosomes was mainly caused by retrotransposons.

To gain insight into the dynamics of LTR retrotransposons, the integration times of 2668 full length LTR retroelements were calculated (Supplementary Fig. 1). Most, 75% (2011/2668), of LTR retroelements integrated into common bean within the last 2 million years (MY), although, some ancient elements that inserted into the genome more than 10 million year ago (MYA) were also found. Notably, the insertion times of 20% (543/2668) of the elements were less than 0.5 MYA, this result likely suggests that these elements inserted recently and some of them may be still active in the genome.

The insertion dynamics of retroelements on the 11 chromosomes vary (Supplementary Fig. 2). More than 84.0% of the complete elements on chromosomes 10 and 11 were inserted less than 2 MYA, however, only 57.0% of the elements on chromosome 9 were integrated within 2 MYA, which is lower than that (65.3% to 78.5%) on other 8 chromosomes.

The 2668 complete LTR retrotransposons were grouped into 165 families including 65 Ty1-copia, 78 Ty3-gypsy and 22 unclassified families according to the described criteria (Wicker et al. 2007). These 165 LTR retrotransposon families contain different numbers of complete retroelements. More than 78% (130/165) of LTR retrotransposon families have less than 10 complete retroelements, however, more than 50 complete elements were found for each of 11 families which contain totally 63% (1690/2668) of the complete elements in common bean genome. It is worth noting that some families show extremely high copy numbers. For example, a small retroelement family named pvRetroS2 contains 446 complete elements. Interestingly, the size of pvRetroS2 is only 342 bp and with 122-bp LTR, thus this family may be considered as the terminal-repeat retrotransposons in miniature (TRIM) group (Witte et al. 2001). Other two Ty3-gypsy families, pvRetro31 and pvRetro48, have 364 and 156 complete copies, respectively. To explore the amplification dynamics of different retrotransposon families, the insertion times of 11 families are compared (Supplementary Figure 3). The insertion times of pvRetroS2 elements range from 0 to more than 10 MYA and no obvious amplification peak was found, this suggests that the amplification events of pvRetroS2 retroelements occurred over a long period and these elements may have an ancient origin. However, the other 10 families show dramatic difference in amplification dynamics with pvRetroS2, most elements of these 10 families inserted in the common bean less than 2 MYA. Impressively, more than 44% (163/364) of pvRetro31 elements were inserted less than 0.5 MYA.

Compared to other sequenced plants, the transposon fraction in common bean is larger than that in rice of 35% [3], but is less than 52% in pigeonpea (Varshney et al. 2001) and 59% in soybean (Schmutz et al. 2010), 62% in sorghum (Paterson et al. 2009) and 85% in maize (Schnable et al. 2009). Despite Ty3-gypsy elements are most abundant in these genomes, however, the ratios of Ty3-gypsy to Ty1-copia are different. The ratio is about 2.5:1 ratio in common bean, it is similar to that of 2.4:1 ratio in soybean, but is lower than that in rice (2.8:1) and sorghum (3.71). LINEs contribute 1.0% of maize, rice and pigeonpea genomes, 0.25% of soybean and 0.04% of sorghum. However, nearly 3.0% of common bean genome is comprised of LINEs. The DNA transposon content is 5.5% in common bean, lower than found in rice (12.3%), sorghum (7.5%), maize (8.6%), and soybean (16.5%). Other than rice, CACTA elements are the most abundant among different superfamilies of DNA elements in the sequenced genomes.

In summary, our results indicate that: 1) The common bean genome harbor 45.4% transposons which is similar to that (45%) in human; 2) The common bean genome likely

have undergone massive amplification of LTR retrotransposons within 2 MYA; 3) 165 LTR retrotransposon families were detected in common bean, the majority of these retrotransposons show low transposition activity.

#### **4 Resistance Gene Analysis**

The complete set of NL proteins was identified in a reiterative process. First, an HMM search of the predicted protein sequences of Phaseolus (*Phaseolus vulgaris* G19833; JGI, version 1.0) was done to identify sequences containing NB-ARC domain. The “trusted cutoff” of the NB-ARC domain HMM (PF00931) established by Pfam (Finn et al. 2010) was used as the threshold for detecting NBS domains. This analysis led to the identification of 398 predicted proteins corresponding to 342 annotated genes that encoded homologs of NL proteins. To identify homologs (such as diverse or not being identified as ORFs by the automated annotation) missed in the first step, all the NL predicted protein sequences identified in the first step were used as query to tBLASTn the entire genome. All resulting sequences in the BLAST output (E value < 1e-10) were manually inspected using the Artemis software tool (Rutherford et al. 2000). This procedure identified 34 additional NL genes. A new identifier was created for each missing genes (the last digits are 50).

#### **Domain predictions and manual annotation**

NL genes were assessed manually in Artemis software for the presence of TIR (PF01582), NB-ARC (PF00931) and LRR (PF00560, PF07723, PF07725, PF12799, PF13306, PF13516, PF13504 and PF13855) domains with HMMer using trusted cut-off defined in Pfam. Coiled Coil domains were identified using Coils (Lupas et al. 1991) with a 14 amino-acid search window and a 2.9 score cut-off threshold. All this information was imported into the annotation platform Artemis for further manual analysis. We classified sequences with stop codons and/or frameshift as pseudogene.

#### **5 Comparison of Glycine and Phaseolus**

The *Glycine max* genome was used as a reference for identification of synteny and for estimates of gene divergence rates between *Glycine* and *Phaseolus*. Synteny blocks within and between *Glycine* and *Phaseolus* were identified by first making blast comparisons of peptide sequences, followed by filtering to top hits per chromosome pair, and then synteny prediction with DAGChainer (Haas et al. 2004). The Ks values for for gene pairs from synteny blocks were calculated, using in-frame CDS alignments, using the codeml program from the PAML package. Mean values per synteny blocks were then taken; histograms of block-mean Ks values are shown in Supplementary Fig. 17.

Syntenic blocks are generally highly collinear with *Glycine*, except in the pericentromeric regions – where synteny is extenuated due to low gene density. The order and structure of synteny blocks in *Glycine* versus *Phaseolus* confirm previous studies on synteny at genetic linkage map level (Galeano et al. 2011; Galeano et al 2009; McClean et al. 2011). For most *Phaseolus* genes, it is possible to find strongly homologous genes in at least 2 homoeologous chromosomes of *Glycine* (Main Figure 1), due to the soybean paleotetraploidization (Gill et al. 2009; Schmutz et al. 2010).

The average numbers of homologous genes per synteny block in the Glycine - Phaseolus and Phaseolus - Phaseolus comparisons are 33 and 14 genes, respectively. Of the Phaseolus genes, 91% (24,861) are contained in synteny blocks with Glycine (via the ~20 Mya speciation), and 57% are in synteny blocks within the Phaseolus - Phaseolus comparison (via the ~58 Mya WGD). Similarly, 86% (46,853) of the total genes in the Glycine genome are in synteny blocks within the Glycine-Glycine comparison (via either the ~10 Mya or the ~58 Mya WGDs), and 96% (46,814) of those Glycine genes are in synteny blocks with Phaseolus (86% of the total genes in the Glycine genome).

Using the modal Ks values from the Ks plots, we determined the likely branch lengths (in Ks units) for the Glycine, Phaseolus, and "shared" portions of an idealized Glycine-Phaseolus gene tree (Supplementary Figure 17). There are three types of paths between leaves (genes) in this tree. Each may be represented as an equation, with the value of the equation being the modal Ks value for that path.

As evident in Ks plots of synteny-block-median Ks values from gene pairs from syntenic regions (Supplementary Figure 17), Phaseolus has evolved faster than soybean since their common ancestor. Assuming that Glycine and Phaseolus separated at 19.2 Mya (7), the Ks rate along the Phaseolus lineage is  $0.1625/19.2 \text{ Mya} = 8.4635 \text{ e-9}$ , and the Ks rate along the Glycine lineage is  $0.1125/19.2 \text{ Mya} = 5.8594 \text{ e-9}$ . The Phaseolus rate has therefore 1.44 times faster than the Glycine rate, since their common ancestor. Using the sharp Ks peak of 0.125 for the Glycine-Glycine WGD, the estimated time to that palaeotetraploidization would be  $(0.125/2)/5.859 \text{ e-9} = 10.6 \text{ Mya}$  (Supplementary Figure 17).

Estimates of the whole-genome duplication (WGD) time range from 45.8 and 57.6 Mya, depending on use of the faster Phaseolus Ks rate or the slower Glycine rate from the common ancestor of Glycine and Phaseolus to the legume WGD episode. This range contains the estimate from Lavin et al. (2005) of 56.5 Mya for the papilionoid radiation, and is similar to the estimates of 44-58 Mya in Schlueter et al. (2004) and Schmutz et al. (2010).

### **Fractionation and locally duplicated gene clusters**

Gene loss and gene retention was identified taking the genes shared and non-shared between *Phaseolus* and *Glycine*. The list of the *Phaseolus* genes retained was used to do a BLASTp analysis against *Glycine* with an E-value  $\leq 1\text{e-}10$  with a cutoff of 80% length and 80% identity, to confirm whether they are lost or moved in the *Glycine* genome, and conversely for *Glycine* genes retained versus *Phaseolus*.

To identify locally duplicated genes in *Phaseolus* and *Glycine*, a BLAST comparison between whole chromosomes in *Phaseolus* and whole chromosomes in *Glycine* was parsed, genes similar at E-value  $\leq 1\text{e-}10$  and clustered within sliding windows of 100 kb, were taken as locally duplicated genes. Over the total of genes in GmPv synteny blocks, 21% (5203/24861) of those genes are locally duplicated in the *Phaseolus* genome and 17% (7849/46814) are locally duplicated in the *Glycine* genome. Furthermore, 20% (5082) of the synteny genes are retained in *Phaseolus* with respect to *Glycine*, and 26% (12269) of the genes are retained in *Glycine* in contrast with *Phaseolus*.

The *Phaseolus* synteny sites, which have copy in at least one homolog in soybean were analyzed per chromosome (Supplementary Table 11), resulting in 1798 *Phaseolus* synteny genes on average per chromosome, having chromosome 2 the highest number of



synteny sites with 2695, corresponding with the highest number of genes in the genome (3338) and with the major number of ortholog genes in *Glycine*. In the same way, chromosome 10 covers the fewest number of synteny sites (1020), corresponding with the slight number of genes in the genome (1659). Fractionation occurs almost in the same proportion in both copies of the *Glycine* genome, only 21 genes in *Glycine* have a third paralog gene (not included in the table).

### **Structural organization**

The synteny blocks identified for *Phaseolus* – *Glycine*, *Glycine* – *Glycine* recent duplication and *Phaseolus* – *Phaseolus* were taken to make the reference rings in a Circos graph for visualization (Krzywinski et al. 2009). Homologous genes in *Phaseolus* derived after speciation are showed with connection lines.

Based on *Phaseolus* data, gene density and repeats density were parsed as described below and recombination rate was parsed dividing the distance in cM between the markers in the genetic map, by the distance in Mb between the markers in the sequence map, taking the midpoint of the location of the markers in the sequence. Sliding windows of 1-Mb at 200-kb intervals was taken and finally the windows with high discrepancies were eliminated.

### **Polyploidy and fractionation**

One effect of polyploidy is fractionation, or loss of genetic material from one or both duplicated chromosomes. Using *Phaseolus* and *Glycine*, we analyzed fractionation from the shared WGD and the more recent WGD unique to *Glycine*. Fractionation occurred in similar proportions in both duplicated copies of the *Glycine* genome (Supplementary Fig. 17). However, based on combined phylogenetic and synteny analyses, we estimate that 9% of the apparent differential gene loss between *Glycine* and *Phaseolus* relative to their shared (pan-legume) duplication is due to expansion of gene clusters in one or the other of the genomes, rather than to selective loss of low-copy (unclustered) genes.

Surprisingly, *Phaseolus* genes occur in locally duplicated clusters at a rate 25% higher than *Glycine* (17.3% in *Glycine* versus 21.5% in *Phaseolus*). Nevertheless, due to the recent WGD in *Glycine*, there are 60% more locally clustered genes in *Glycine* than *Phaseolus*, and the total number of paralogs in *Glycine* is much higher (16,919 in *Glycine* versus 3,197 in *Phaseolus* – or 31% versus 12% of total genes).

## **6 Historical Population Size Analysis**

### **Divergence of wild Mesoamerica and wild Andean pools**

A recent study based on five gene loci from a wide collection of wild common bean samples (Bitocchi et al. 2012) pointed to Mesoamerica as the origin of all common bean varieties existing today. There are two major gene pools for the wild *Phaseolus vulgaris*, wild Mesoamerica and wild Andean, which underwent two independent domestications giving rise to all the major landraces. To investigate the details of the divergence and demographic history of the two wild pools, we make use of the whole genome pooled

sequencing data (Supplementary Table 12) consisting of 30 individuals within each pool, and make inferences about the demographic parameters by modeling the joint allele frequency spectrum (jAFS) using the package *dadi* version 1.6.3 (Gutenkunst et al. 2009).

To minimize bias in our demographic inference due to selection effects, we used neutral sites which are defined to be at least 5kb away from a gene (as annotated in the gff3 file v1.0) and are not located in the repetitive regions (as defined by Repeatmasker (Smit et al. 1996)). Due to the high selfing rate (~93%) in common bean (Ibarra-Perez et al. 1997), the number of different haplotypes for each pooled sample is close to 30. The data were thus down-sampled to 25 haplotypes for each pool via hypergeometric projection (i.e. random sampling 25 alleles without replacement), from which the joint allele frequency spectrum (jAFS) was derived. As spurious singletons can arise due to sequencing and mapping errors, we excluded sites appearing as singletons in either of the two pools, resulting in a total of 662,835 polymorphic sites for the jAFS.

We investigated and compared different demographic models based on the relative log-likelihoods of the models given the observed site frequency spectrum. No population growth or decline was detected in the ancestral population before the two pools split. Based on this and other observations, we select a model (Main text Figure 1) with constant population size before the divergence of the two pools, and allow an epoch of constant population size for the wild Andean after it split from the wild Mesoamerican population, followed by an exponential growth phase till the present. By contrast, for the wild Mesoamerican population, a single epoch of exponential growth is adequate to describe its post-divergence history. Asymmetric migration rates are assumed in the model (Main text Figure 1).

To make inference of model parameters, we ran *dadi* simulations with different starting points in an 8-dimensional parameter space, till convergence is achieved. Parameter values for the best fit model are listed in Supplementary Table 13, using a base substitution rate  $\mu=8.46e-9/\text{bp}/\text{yr}$  (S. Cannon, unpublished) derived from silent sites. To estimate parameter uncertainties, we divided the genome into 10cM segments and performed 100 bootstraps on the chromosome segments. Confidence intervals were derived based on simulation results for the bootstrapped samples. The results are shown in Supplementary Table 13.

Comparisons between model prediction and observed data are shown in Supplementary Figs. 24 and 25. Supplementary Fig. 24(a) shows the summary statistics of 4 types of mutually exclusive single nucleotide variants, with 80% of all variants accounted for by the wild Mesoamerican pool (MW) alone. By contrast, only 12.5% of the variants are observed exclusively in the wild Andean pool (AW). This great disparity in genetic diversity between the two pools can be explained by the strong population bottleneck in the Andean gene pool and is consistent with the Mesoamerican origin of the common bean (see discussion later). The marginal allele frequency distribution for each of the two pools was shown in Supplementary Figs. 24(b) and Fig. 24(c), respectively, with good agreement between model prediction and data.

The joint allele frequency spectra between the two pools are shown in Supplementary Figure 25. The difference between the model and data is described by Anscombe residuals following *dadi* (Gutenkunst et al. 2009), and is shown in the lower panel. As can be seen from the lower left panel of Supplementary Fig. 25, the model predicts fewer sites with low-frequency alleles in both pools, and an excess of sites with

large allele frequency differences between the two pools. These discrepancies may reflect a more complex history of the common bean than captured by the model presented here. For example, the migration rates are more likely to be time-varying than stationary, as the wild Andean population size had changed by a factor of  $\sim 60$  since its founding population. Another feature unaccounted for by our model is the possible genetic structure within the wild Mesoamerican gene pool (Bitocchi et al. 2012). These and other details may be resolved with additional sequencing beyond the two pooled datasets.

## **7 Common Bean Domestication Analysis**

### **Development of common bean wild and landrace populations for pooled resequencing.**

Initially, 135 wild and 180 landrace genotypes, collected from the full geographic range of *P. vulgaris*, were scored with 22 indel markers (Mafi Modhaddam et al. 2013) distributed throughout the genome. A Bayesian analysis was performed on the genotype data within each of the two groups using the STRUCTURE software (Pritchard et al. 2000a; Falush et al. 2003). The linkage ancestry model with correlated allele frequencies was used to analyze the data with a haploid phase setting because common bean is self-fertilizing species. Based on previous experience with a subset of this population (McClellan et al. 2012), a total of 20,000 iterations were performed following a burn-in length of 50,000. In each case, the number of subpopulations ranged from  $k=2$  to  $k=10$  with 10 runs for each subpopulation size. For the wild genotypes,  $k=2$  best fit the data (Evanno et al. 2005). These subpopulations correspond geographically to the wild Mesoamerican and wild Andean gene pools. Because many studies have described further substructure in common bean landraces,  $k=6$  was chosen to further subdivide the landrace genotypes. At  $k=2$ , Mesoamerican and Andean landrace subpopulations were defined. At  $k=3$ , the Mesoamerican landraces were split into Mexico and Central American subpopulations. At  $k=4$  and  $k=5$ , the Mexico subpopulation was further split into three subpopulations. The original Andean subpopulation at  $k=2$  was retained from  $k=3-5$ , and at  $k=6$ , the southern and northern Andean landrace subpopulations were defined. A genotype was assigned to subpopulation if its subpopulation parentage was  $>70\%$ . Based on this STRUCTURE analysis, we developed pooled populations for sequencing. From each wild subpopulation, 30 individuals were selected to create wild Mesoamerican and Andean populations for pooled sequencing. All members of each subpopulation were from distinct geographic locations. The average parentage for each genotype within each wild pool was 98%. Similarly, six landrace populations were developed for pooled sequencing (Supplementary Table 12). Average parentage for members in these populations ranged from 90% to 96%. A graphical display of the population membership of the genotypes selected for pooled resequencing is found in Supplementary Fig. 18.

### **DNA sequencing and SNP identification.**

DNA from each of these pooled populations was sequenced to  $\sim 4X$  depth using Illumina technology. Each read was mapped to v1.0 version of the assembled reference genome using BWA (Li and Durbin 2009) with maximum number of hits set to 8. All reads with a quality score less than 25 were discarded. An mpileup file was created for each sequenced

pool using SAMtools (Li et al. 2009) with the `-BA` options. VarScan 2.2.10 (Koboldt et al. 2012) utilized the mpileup file for SNP calling with the following parameters: minimum coverage = 5; minimum consensus quality = 25, minimum variant frequency = 0.01. To further reduce SNP call quality, 1) a SNP was discarded if the reference or variant allele was a 'N'; 2) a SNP was discarded if more than one variant allele was observed; and 3) if the variant allele was a single nucleotide indel that position was discarded.

Similar to previous work in chicken and pig (Rubin et al. 2010, 2012), SNP data from several pooled populations were combined. Mesoamerican and Andean landrace population SNP diversity data were created by combining SNP data for each of the appropriate race pools. By pooling the SNP data from these pools, we were able to create datasets representative of the diversity found within the early domestication populations from which landraces were subsequently derived. Additionally, the data from the three Mexican subpopulations were combined to create a single race Mexican landrace pool. The minimum number of reads required for the reference or variant allele was three. The number of SNPs ranged from 8,890,318 for the wild Mesoamerican pool to 1,397,405 for the Peru landrace pool (Supplementary Table 14). Among all wild genotypes, 10,158,326 SNPs were observed while the Mesoamerican landraces contained 9,661,807 SNPs, and all Andean landraces 3,154,648. For all individual and combined pools, the proportion of SNPs found within genes was ~16% indicating that the genes were not disproportionately prone to more (or less) variation.

### Population genetics statistics.

Several population genetics statistics were calculated for each 100kb/10kb and 10kb/2kb sliding window, and each gene within each DNA pool. Any window or gene with >50% Ns were excluded, and all statistics were based on the number of non-N nucleotides in the window. Nucleotide diversity ( $\pi$ ; Tajima 1983), defined as the average number of nucleotide differences per site between any two DNA sequences chosen randomly from the sample population, was calculated using the following formula.

$$\pi = \sum_{i=1}^n \sum_{j=1}^i x_i x_j \pi_{ij}$$

Here,  $x_i$  and  $x_j$  are the respective frequencies of the  $i^{\text{th}}$  and  $j^{\text{th}}$  sequences,  $\pi_{ij}$  is the number of nucleotide differences per nucleotide site between the  $i^{\text{th}}$  and  $j^{\text{th}}$  sequences and  $n$  is the number of sequences in the sample. The Watterson estimate ( $\theta_w$ ; Watterson 1975), which is an estimation of population mutation rate, was calculated based on the number of segregating sites using the formula

$$\theta_w = \frac{S}{a_n}$$

where  $S$  is the number of segregating sites and

$$a_n = \sum_{i=1}^{n-1} \frac{1}{i}$$

Tajima's D was calculated as described in Tajima (1989).  $F_{ST}$ , (Hudson et al 1992) is a measure of population differentiation, estimated from the average pairwise differences between chromosomes in each analysis panel compared to the combined samples as described in The International HapMap Consortium (2005).

$$F_{ST} = 1 - \frac{\sum_j \binom{n_j}{2} \sum_i 2 \frac{n_{ij}}{n_j-1} x_{ij} (1-x_{ij}) / \sum_j \binom{n_j}{2}}{\sum_i 2 \frac{n_i}{n_i-1} x_i (1-x_i)}$$

where  $x_{ij}$  is the estimated frequency of the minor allele at SNP  $i$  in population  $j$ ,  $n_{ij}$  is the number of genotyped chromosomes at that position, and  $n_j$  is the number of chromosomes analyzed in that population. The lack of the  $j$  subscript in the denominator indicates that statistics  $n_i$  and  $x_i$  are calculated across the combined data sets.

The relative diversity level among two pooled samples was compared by a nucleotide diversity ( $\pi$ ) ratio between the two pools for each window or gene. For example, the ratio  $\pi_{MA-wild} / \pi_{MA-landrace}$  measures the relative difference in diversity between the Mesoamerican wild gene pool and the Mesoamerican landrace gene pool. Similarly,  $F_{ST}$  (TIHC 2005) was calculated for each window and gene to compare the differentiation between any two pools.

### **Identifying selected windows and genes and defining sweep windows.**

A number of statistical approaches are currently favored when evaluating genome-wide resequencing data to discover genomic regions or genes that are putatively undergoing selection. Divergence approaches use a comparison of nucleotide diversity between an ancestral state and a derived state. These primarily include diversity ratios (Huang et al. 2012; Xu et al. 2012) or reduced heterozygosity (Rubin et al. 2010) among populations. Other studies have used population differentiation methods, such as  $F_{ST}$  to identify selected regions (Lam et al. 2010; Turner et al. 2010). Rather than relying on a single statistic, we adopted a strict composite scoring system that combined diversity and differentiation data to identify putative genomic regions or genes under selection. This is similar to the approach applied to silk moth where a reduction in nucleotide diversity and Tajima's D was applied to discover domestication genes (Xia et al. 2009). Here, a 10kb/2kb window or a gene was considered a selection window or domestication candidate gene if it was in the upper 90% of a bootstrap simulation population ( $n=1000$ ) for the  $\pi_{wild} / \pi_{landrace}$  ratio and  $F_{ST}$  statistics. The cutoff values for various comparisons can be found in Supplementary Table 18. All 10kb/2kb selection windows within 40kb of each other were merged in a "sweep window". The number of domestication candidates and total genes were calculated for sweep window.

### **Annotating common bean seed weight/size candidates.**

We identified candidate common bean seed size genes by a blastp analysis using Arabidopsis seed size/weight genes (Van Daele et al. 2012) as a query against a database of the common bean protein sequences. Any common bean gene model hit with 50% identity and 80% coverage that matched 70% of the query length inherited the Arabidopsis seed weight gene name. A total of 141 common bean gene models inherited the seed weight gene name (Supplementary Table 19).

### Association Mapping

As part of the USDA Common Bean Coordinated Agricultural Project, a collection of 280 diverse modern common bean varieties from the Middle American gene pool were grown in replicated field trials by the North Dakota State University, Michigan State University, University of Nebraska, and Colorado State University bean breeding programs. Each genotype in the trial was genotyped with 34,799 SNPs. Of these, 10,318 SNPs were from the Illumina Infinium platform used to develop the SNP-based genetic map (see Methods Summary), and 24,481 SNPs were obtained by genotype-by-sequencing (GBS) technology (Elshire et al. 2011). The GBS data was generated by the Institute for Genomic Diversity, Cornell University. Missing data were imputed in fastPHASE 1.3 (Scheet and Stephens 2006). Adjusted means for seed weight data across all locations were calculated using the MIXED procedure in SAS9.3 (SAS 2002) where the genotype was the fixed effect and all other factors were considered as random. A mixed linear model (MLM) controlling for population relatedness was used to conduct the genome wide association study (GWAS). Multiple statistical models were tested, and a mixed model (Yu et al. 2005) that controlled for genotype relatedness and population structure was chosen. An identity-by-state (IBS) kinship matrix [EMMA, (Kang et al. 2008)] was used to control for population relatedness, while two principal components were used to control for population structure. The kinship matrix was calculated using marker loci with pairwise  $r^2 > 0.5$ . Linkage disequilibrium ( $r^2$ ) between all marker loci was calculated in Plink (Purcell et al. 2007) using loci with a minor allele frequency (MAF)  $\geq 0.05$ . The EMMA kinship matrix and the GWAS were calculated in the GAPIT package in the R programming language (Lipka et al. 2012), without P3D and compression.

### References

- Bitocchi, E., L. Nanni, E. Bellucci, M. Rossi, A. Giardini, P.S. Zeuli, G. Logozzo, J. Stougaard, P. McClean and G. Attene. 2012. Mesoamerican origin of the common bean (*Phaseolus vulgaris* L.) is revealed by sequence data. Proc. Natl. Acad Sci. 109:788-796.
- Elshire, R. J., Glaubitz, J. C., Sun, Q., Poland, J. A., Kawamoto, K., Buckler, E. S., & Mitchell, S. E. 2011. A robust, simple genotyping-by-sequencing (GBS) approach for high diversity species. PloS One 6: e19379.
- Evanno, G., Regnaut, S., & Goudet, J. 2005. Detecting the number of clusters of individuals using the software STRUCTURE: a simulation study. Molecular Ecology, 14: 2611-2620.
- Falush, D., Stephens, M., & Pritchard, J. K. 2003. Inference of population structure using multilocus genotype data: linked loci and correlated allele frequencies. Genetics 164: 1567-1587.

- Finn, R.D., J. Mistry, P. Coggill, A. Heger, J.E. Pollington, O.L. Gavin, P. Gunasekaran, G. Ceric, K. Forslund, L. Holm, E.L. Sonnhammer, S.R. Eddy and A. Bateman. 2010. The Pfam protein families database. *Nucleic Acid Res.* 38: 211-222.
- Galeano, C. H., Fernandez, A. C., Franco-Herrera, N., Cichy, K. A., McClean, P. E., Vanderleyden, J., & Blair, M. W. 2011. Saturation of an intra-gene pool linkage map: towards a unified consensus linkage map for fine mapping and synteny analysis in common bean. (T. Yin, Ed.) *PloS one*, 6(12).
- Galeano, C. H., Fernández, A. C., Gómez, M., & Blair, M. W. 2009. Single strand conformation polymorphism based SNP and Indel markers for genetic mapping and synteny analysis of common bean (*Phaseolus vulgaris* L.). *BMC genomics*, 10, 629.
- Gill, N., Findley, S., Walling, J. G., Hans, C., Ma, J., Doyle, J., Stacey, G., et al. 2009. Molecular and chromosomal evidence for allopolyploidy in soybean. *Plant physiology*, 151, 1167–74.
- Gutenkunst, R., R.D. Hernandez, S.H. Williamson and C.D. Bustamante. 2009. Inferring the Joint Demographic History of Multiple Populations from Multidimensional SNP Frequency Data, *PLOS Genetics* 5:e1000695.
- Haas, B. J., Delcher, A. L., Wortman, J. R., & Salzberg, S. L. 2004. DAGchainer: a tool for mining segmental genome duplications and synteny. *Bioinformatics (Oxford, England)*, 20: 3643–6.
- Ibarra-Perez F.J., B. Ehdai and J.G. Waines. 1997. Estimation of outcrossing rate in common bean. *Crop Sci* 37: 60–65.
- Iwata, A., A. Tek; M. Richard, B. Abernathy, A. Fonsêca, J. Schmutz, N. Chen, V. Thareau, G. Magdelenat, Y. Li, M. Murata, A. Pedrosa-Harand, V. Geffroy, K. Nagaki, S.A. Jackson. 2013. Identification and characterization of functional centromeres of common bean. *Plant J.* DOI: 10.1111/tbj.12269.
- Kang, H. M., Zaitlen, N. A., Wade, C. M., Kirby, A., Heckerman, D., Daly, M. J., & Eskin, E. 2008. Efficient control of population structure in model organism association mapping. *Genetics* 178: 1709-1723.
- Koboldt, D. C., Zhang, Q., Larson, D. E., Shen, D., McLellan, M. D., Lin, L., Miller, C. A., Mardis, E. R., Ding, L., & Wilson, R. K. 2012. VarScan 2: somatic mutation and copy number alteration discovery in cancer by exome sequencing. *Genome Research* 22: 568-576.
- Kumar A, Bennetzen JL. 1999. Plant retrotransposons. *Annu Rev Genet.* 33:479-532.
- International Rice Genome Sequencing Project. 2005. The map-based sequence of the rice genome. *Nature* 436:793–800.
- Krumsiek J, Arnold R, Rattei T. 2007. Gepard: A rapid and sensitive tool for creating dotplots on genome scale. *Bioinformatics* 23: 1026-8. PMID: 17309896
- Krzywinski, M., Schein, J., Birol, I., Connors, J., Gascoyne, R., Horsman, D., Jones, S. J., et al. 2009. Circos: an information aesthetic for comparative genomics. *Genome research*, 19, 1639–45.
- Lavin, M., Herendeen, P. & Wojciechowski, M. Evolutionary Rates Analysis of Leguminosae Implicates a Rapid Diversification of Lineages during the Tertiary. *Syst. Biol* 54, 575–594.
- Lippman Z, Martienssen R. 2004. The role of RNA interference in heterochromatic silencing. *Nature* 431:364-370.

- Lupas, A., M. Van Dyke and J. Stock. 1991. Predicting coiled coils from protein sequences. *Science* 252: 1162-1164.
- Li, H., & Durbin, R. 2009. Fast and accurate short read alignment with Burrows–Wheeler transform. *Bioinformatics* 25: 1754-1760.
- Li, H., Handsaker, B., Wysoker, A., Fennell, T., Ruan, J., Homer, N., Marth, G., Abecasis, G. & Durbin, R. 2009. The sequence alignment/map format and SAMtools. *Bioinformatics* 25: 2078-2079.
- Lipka, A. E., Tian, F., Wang, Q., Peiffer, J., Li, M., Bradbury, P. J., Gore, M. A., Buckler, E.S. & Zhang, Z. 2012. GAPIT: genome association and prediction integrated tool. *Bioinformatics* 28: 2397-2399.
- Mafi Moghaddam, S., Song, Q., Mamidi, S., Schmutz, J., Lee, R., Cregan, P., Osorno, J. & McClean, P. E. 2013. Developing market class specific InDel markers from next generation sequence data in *Phaseolus vulgaris* L. *Frontiers in Plant Science* 1: 0.
- McClean, P. E., Mamidi, S., McConnell, M., Chikara, S. & Lee, R. 2010. Synteny mapping between common bean and soybean reveals extensive blocks of shared loci. *BMC Genomics*. 11:184.
- McClean, P. E., Terpstra, J., McConnell, M., White, C., Lee, R., & Mamidi, S. 2012. Population structure and genetic differentiation among the USDA common bean (*Phaseolus vulgaris* L.) core collection. *Genetic Resources and Crop Evolution*, 59: 499-515.
- Nei, M., & Li, W. H. 1979. Mathematical model for studying genetic variation in terms of restriction endonucleases. *Proceedings of the National Academy of Sciences*, 76: 5269-5273.
- Paterson AH, Bowers JE, Bruggmann R, Dubchak I, Grimwood J, et al. 2009. The *Sorghum bicolor* genome and the diversification of grasses. *Nature*. 457:551-556.
- Pérez-Rodríguez, P., Riaño-Pachón, D. M., Corrêa, L. G. G., Rensing, S. A., Kersten, B., & Mueller-Roeber, B. 2010. PlnTFDB: updated content and new features of the plant transcription factor database. *Nucleic acids research* 38, D822-D827.
- Pritchard, J. K., Stephens, M., & Donnelly, P. 2000. Inference of population structure using multilocus genotype data. *Genetics*, 155: 945-959.
- Purcell, S., Neale, B., Todd-Brown, K., Thomas, L., Ferreira, M. A., Bender, D., Maller, J., Sklar, P., de Bakker, P., Daly, M. & Sham, P. C. 2007. PLINK: a tool set for whole-genome association and population-based linkage analyses. *The American Journal of Human Genetics*, 81: 559-575.
- Rutherford, K., J. Parkhill, J. Crook, T. Horsnell, P. Rice, M.A. Rajandream and B. Barrell. 2000. Artemis: sequence visualization and annotation. *Bioinformatics* 16: 944-945.
- Rubin, C. J., Megens, H. J., Barrio, A. M., Maqbool, K., Sayyab, S., Schwochow, D., Wang, C., Carlborg, O., Jern, P., Jorgensen, C. B., Archibald, A. L., Fredhold, M. Groenen, M. A. M. & Andersson, L. 2012. Strong signatures of selection in the domestic pig genome. *Proceedings of the National Academy of Sciences*, 109: 19529-19536.
- Rubin, C. J., Zody, M. C., Eriksson, J., Meadows, J. R., Sherwood, E., Webster, M. T., Jiang, L., Ingman, M., Sharpe, T., Ka. S., Hallbook, F., Besnier, F. Carlborg, O., Bed'hom, B., Tixier-Boichard, M., Jensen, P., Siegel, P., Lindblad-Toh, K. & Andersson, L. 2010. Whole-genome resequencing reveals loci under selection during chicken domestication. *Nature*, 464: 587-591.



- SAS Institute. (Cary, NC., 2002).
- Scheet, P., & Stephens, M. 2006. A fast and flexible statistical model for large-scale population genotype data: applications to inferring missing genotypes and haplotypic phase. *The American Journal of Human Genetics*, 78: 629-644.
- Schlueter, J. A., Dixon, P., Granger, C., Grant, D., Clark, L., Doyle, J. J., & Shoemaker, R. C. (2004, October 15). Mining EST databases to resolve evolutionary events in major crop species. *Genome / National Research Council Canada = Génome / Conseil national de recherches Canada*. NRC Research Press Ottawa, Canada. doi:10.1139/g04-047
- Varshney RK, Chen W, Li Y, Bharti AK, Saxena RK, et al. .2011.. Draft genome sequence of pigeonpea (*Cajanus cajan*), an orphan legume crop of resource-poor farmers. *Nat Biotechnol*. 30:83-89.
- Schmutz J, Cannon SB, Schlueter J, Ma J, Mitros T, et al. 2010. Genome sequence of the palaeopolyploid soybean. *Nature*. 463:178-183.
- Schnable PS, Ware D, Fulton RS, Stein JC, Wei F, et al. 2009. The B73 maize genome: complexity, diversity, and dynamics. *Science* 326:1112-1115.
- Tajima, F. 1989. Statistical method for testing the neutral mutation hypothesis by DNA polymorphism. *Genetics*, 123: 585-595.
- TIHC (The International HapMap Consortium). 2005. A haplotype map of the human genome. *Nature* 437: 1299-1320.
- Thomas D. Wu and Serban Nacu. Fast and SNP-tolerant detection of complex variants and splicing in short reads. *Bioinformatics* 2010 26: 873-881.
- Watterson, G.A. 1975. On the number of segregating sites in genetical models without recombination. *Theor. Popul. Biol.* 7: 256-276.
- Wicker T, Sabot F, Hua-Van A, Bennetzen JL, Capy P, et al. 2007. A unified classification system for eukaryotic transposable elements. *Nat Rev Genet*. 8:973-982.
- Witte CP, Le QH, Bureau T, Kumar A. 2001. Terminal-repeat retrotransposons in miniature (TRIM) are involved in restructuring plant genomes. *Proc Natl Acad Sci USA* 98: 13778–13783.
- Xia, Q., Guo, Y., Zhang, Z., Li, D., Xuan, Z., Li, Z., Dai, F., Li, Y., Cheng, D., Li, R., Cheng, T., Jiang, T., Becquet, C., Xu, X., Liu, C, Zha, X., Fan, W., Lin, Y., Shen, Y., Jiang, ., Jensen, J., Hellmann, I, Tang, S., Zhao, P., Xu, H., Yu, C., Zhang, G., Li, J., Cao, J., Liu, Sh. He. N., Zhou, Y., Liu, H., Zhao, J., Ye. C. Du, Z., Pan, G., Zhao, A., Shao, H., Zeng, W., Wu, P., Li, C., Pan, M., Li, J., Yin, X., Li, D., Wang, J., Zheng, H., Wang, W., Zhang, X., Li, S., Yang, H., Lu, C., Nielsen, R., Zhou, Z., Wang, J. Xiang, Z. & Wang, J. 2009. Complete resequencing of 40 genomes reveals domestication events and genes in silkworm (*Bombyx*). *Science*, 326: 433-436.
- Yu, J., Pressoir, G., Briggs, W. H., Bi, I. V., Yamasaki, M., Doebley, J. F., McMullen, M. D., Gaut, B. S., Nielsen, D. M., Holland, J. B., Kresovich, S. & Buckler, E. S. 2005. A unified mixed-model method for association mapping that accounts for multiple levels of relatedness. *Nature genetics*, 38: 203-208.
